# Supplementary material for: Patient experience of different regional models of urgent and emergency care: a cross-sectional survey study
Source: PubMed Central journal article supplement — BMJ Open. 2017 Mar 20;7(3):e013339. doi: 10.1136/bmjopen-2016-013339 (PMC5372115; doi:10.1136/bmjopen-2016-013339), 2017-03-20
Supplement: bmjopen-2016-013339supp3.pdf [file bmjopen-2016-013339supp3.pdf]

## Supplementary File: Item-level responses and results of regression analyses.

### Item-level responses (national and regional):

**Table 1. Distribution of responses to UCSQ item - national**

| Description                                                                            | Strongly Disagree | Disagree | Unsure | Agree | Strongly Agree |
|----------------------------------------------------------------------------------------|-------------------|----------|--------|-------|----------------|
| <i>Entry into the system</i>                                                           |                   |          |        |       |                |
| I did not know which service to go to about this problem.                              | 39.3              | 43.6     | 2.6    | 10.2  | 4.3            |
| I felt that the first service I tried was the right one to help me.                    | 2                 | 4.4      | 1.3    | 46.6  | 45.8           |
| I felt sometimes I had ended up in the wrong place.                                    | 34.3              | 51       | 1.5    | 9.7   | 3.5            |
| <i>Progress through the system</i>                                                     |                   |          |        |       |                |
| My concerns were taken seriously by everyone.                                          | 1.9               | 6.8      | 1.3    | 52.2  | 37.8           |
| I was made to feel like I was wasting everyone's time.                                 | 39.2              | 51.3     | 1.3    | 6     | 2.3            |
| I had to push to get the help I needed.                                                | 29.9              | 49.3     | 1.8    | 12.5  | 6.5            |
| I moved through the system smoothly.                                                   | 4.1               | 9.9      | 3.5    | 55.4  | 27.1           |
| It took too long to get the care needed.                                               | 26.5              | 49.7     | 3.5    | 13    | 7.3            |
| I felt that no one took responsibility and sorted out my problem.                      | 30.4              | 56.6     | 2.3    | 7.7   | 3.1            |
| I saw the right people.                                                                | 1.3               | 4.8      | 1.5    | 62.5  | 30             |
| I felt I was given the wrong advice.                                                   | 32.2              | 56.8     | 2.5    | 6.5   | 1.9            |
| Services did not seem to talk to each other.                                           | 20.1              | 48.2     | 4.7    | 19.5  | 7.5            |
| At each stage I was confident in the advice services gave me.                          | 2                 | 8.2      | 3.9    | 58.4  | 27.4           |
| <i>Patient convenience of the system</i>                                               |                   |          |        |       |                |
| Travelling to the services I needed was easy.                                          | 3.9               | 7.6      | 1.6    | 52.2  | 34.7           |
| I was told how long I'd have to wait.                                                  | 14.3              | 24.8     | 3.9    | 39.4  | 17.6           |
| Services had the information they needed about me.                                     | 3.7               | 11.9     | 2.7    | 49    | 32.7           |
| I had to repeat myself too many times.                                                 | 29.7              | 48.4     | 2.5    | 13.1  | 6.1            |
| Services understood that I had responsibilities, like my need to look after my family. | 3.9               | 10.5     | 7      | 53.2  | 25.4           |

**All figures are percentages**

**Table 2. Distribution of responses to overall rating of care item - national**

|                        | Excellent | Very Good | Good | Fair | Poor | Very Poor |
|------------------------|-----------|-----------|------|------|------|-----------|
| Overall rating of care | 35.9      | 33.1      | 17.9 | 8.1  | 2.5  | 2.4       |

**All figures are percentages**

**Entry1 - I did not know which service to go to about this problem.**

| Region     |         |                   | Frequency | Percent | Valid Percent | Cumulative Percent |
|------------|---------|-------------------|-----------|---------|---------------|--------------------|
| South      | Valid   | Strongly Disagree | 62        | 6.2     | 44.0          | 44.0               |
|            |         | Disagree          | 59        | 5.9     | 41.8          | 85.8               |
|            |         | Neither           | 3         | .3      | 2.1           | 87.9               |
|            |         | Agree             | 11        | 1.1     | 7.8           | 95.7               |
|            |         | Strongly Agree    | 6         | .6      | 4.3           | 100.0              |
|            |         | Total             | 141       | 14.1    | 100.0         |                    |
|            | Missing | System            | 862       | 85.9    |               |                    |
| Total      |         |                   | 1003      | 100.0   |               |                    |
| Mid-West   | Valid   | Strongly Disagree | 63        | 6.4     | 42.0          | 42.0               |
|            |         | Disagree          | 66        | 6.7     | 44.0          | 86.0               |
|            |         | Neither           | 5         | .5      | 3.3           | 89.3               |
|            |         | Agree             | 11        | 1.1     | 7.3           | 96.7               |
|            |         | Strongly Agree    | 5         | .5      | 3.3           | 100.0              |
|            |         | Total             | 150       | 15.1    | 100.0         |                    |
|            | Missing | System            | 842       | 84.9    |               |                    |
| Total      |         |                   | 992       | 100.0   |               |                    |
| South East | Valid   | Strongly Disagree | 49        | 4.9     | 36.0          | 36.0               |
|            |         | Disagree          | 64        | 6.4     | 47.1          | 83.1               |
|            |         | Neither           | 2         | .2      | 1.5           | 84.6               |
|            |         | Agree             | 15        | 1.5     | 11.0          | 95.6               |
|            |         | Strongly Agree    | 6         | .6      | 4.4           | 100.0              |
|            |         | Total             | 136       | 13.7    | 100.0         |                    |
|            | Missing | System            | 860       | 86.3    |               |                    |
| Total      |         |                   | 996       | 100.0   |               |                    |
| North East | Valid   | Strongly Disagree | 62        | 6.2     | 39.0          | 39.0               |
|            |         | Disagree          | 69        | 6.9     | 43.4          | 82.4               |
|            |         | Neither           | 2         | .2      | 1.3           | 83.6               |
|            |         | Agree             | 18        | 1.8     | 11.3          | 95.0               |
|            |         | Strongly Agree    | 8         | .8      | 5.0           | 100.0              |
|            |         | Total             | 159       | 16.0    | 100.0         |                    |
|            | Missing | System            | 834       | 84.0    |               |                    |
| Total      |         |                   | 993       | 100.0   |               |                    |
| West       | Valid   | Strongly Disagree | 42        | 4.2     | 33.9          | 33.9               |
|            |         | Disagree          | 55        | 5.5     | 44.4          | 78.2               |
|            |         | Neither           | 1         | .1      | .8            | 79.0               |
|            |         | Agree             | 20        | 2.0     | 16.1          | 95.2               |
|            |         | Strongly Agree    | 6         | .6      | 4.8           | 100.0              |

|                   |         |                   |      |       |       |       |
|-------------------|---------|-------------------|------|-------|-------|-------|
|                   |         | Total             | 124  | 12.3  | 100.0 |       |
|                   | Missing | System            | 883  | 87.7  |       |       |
|                   |         | Total             | 1007 | 100.0 |       |       |
| Dublin North East | Valid   | Strongly Disagree | 51   | 5.1   | 35.2  | 35.2  |
|                   |         | Disagree          | 58   | 5.8   | 40.0  | 75.2  |
|                   |         | Neither           | 5    | .5    | 3.4   | 78.6  |
|                   |         | Agree             | 21   | 2.1   | 14.5  | 93.1  |
|                   |         | Strongly Agree    | 10   | 1.0   | 6.9   | 100.0 |
|                   |         | Total             | 145  | 14.5  | 100.0 |       |
|                   | Missing | System            | 856  | 85.5  |       |       |
|                   |         | Total             | 1001 | 100.0 |       |       |
| Dublin Midlands   | Valid   | Strongly Disagree | 63   | 6.3   | 42.0  | 42.0  |
|                   |         | Disagree          | 63   | 6.3   | 42.0  | 84.0  |
|                   |         | Neither           | 5    | .5    | 3.3   | 87.3  |
|                   |         | Agree             | 13   | 1.3   | 8.7   | 96.0  |
|                   |         | Strongly Agree    | 6    | .6    | 4.0   | 100.0 |
|                   |         | Total             | 150  | 14.9  | 100.0 |       |
|                   | Missing | System            | 858  | 85.1  |       |       |
|                   |         | Total             | 1008 | 100.0 |       |       |
| Dublin South      | Valid   | Strongly Disagree | 65   | 6.5   | 40.9  | 40.9  |
|                   |         | Disagree          | 74   | 7.4   | 46.5  | 87.4  |
|                   |         | Neither           | 7    | .7    | 4.4   | 91.8  |
|                   |         | Agree             | 10   | 1.0   | 6.3   | 98.1  |
|                   |         | Strongly Agree    | 3    | .3    | 1.9   | 100.0 |
|                   |         | Total             | 159  | 15.9  | 100.0 |       |
|                   | Missing | System            | 843  | 84.1  |       |       |
|                   |         | Total             | 1002 | 100.0 |       |       |

**Entry2 - I felt that the first service I tried was the right one to help me.**

| Region     |         |                   | Frequency | Percent | Valid Percent | Cumulative Percent |
|------------|---------|-------------------|-----------|---------|---------------|--------------------|
| South      | Valid   | Strongly Disagree | 2         | .2      | 1.4           | 1.4                |
|            |         | Disagree          | 11        | 1.1     | 7.4           | 8.8                |
|            |         | Neither           | 2         | .2      | 1.4           | 10.1               |
|            |         | Agree             | 68        | 6.8     | 45.9          | 56.1               |
|            |         | Strongly Agree    | 65        | 6.5     | 43.9          | 100.0              |
|            |         | Total             | 148       | 14.8    | 100.0         |                    |
|            | Missing | System            | 855       | 85.2    |               |                    |
| Total      |         |                   | 1003      | 100.0   |               |                    |
| Mid-West   | Valid   | Disagree          | 6         | .6      | 3.9           | 3.9                |
|            |         | Neither           | 4         | .4      | 2.6           | 6.5                |
|            |         | Agree             | 80        | 8.1     | 51.9          | 58.4               |
|            |         | Strongly Agree    | 64        | 6.5     | 41.6          | 100.0              |
|            |         | Total             | 154       | 15.5    | 100.0         |                    |
|            | Missing | System            | 838       | 84.5    |               |                    |
| Total      |         |                   | 992       | 100.0   |               |                    |
| South East | Valid   | Strongly Disagree | 3         | .3      | 2.2           | 2.2                |
|            |         | Disagree          | 8         | .8      | 5.8           | 7.9                |
|            |         | Agree             | 69        | 6.9     | 49.6          | 57.6               |
|            |         | Strongly Agree    | 59        | 5.9     | 42.4          | 100.0              |
|            |         | Total             | 139       | 14.0    | 100.0         |                    |
|            | Missing | System            | 857       | 86.0    |               |                    |
| Total      |         |                   | 996       | 100.0   |               |                    |
| North East | Valid   | Strongly Disagree | 5         | .5      | 3.0           | 3.0                |
|            |         | Disagree          | 9         | .9      | 5.4           | 8.4                |
|            |         | Neither           | 3         | .3      | 1.8           | 10.2               |
|            |         | Agree             | 65        | 6.5     | 39.2          | 49.4               |
|            |         | Strongly Agree    | 84        | 8.5     | 50.6          | 100.0              |
|            | Total   | 166               | 16.7      | 100.0   |               |                    |
| Missing    | System  | 827               | 83.3      |         |               |                    |
| Total      |         |                   | 993       | 100.0   |               |                    |
| West       | Valid   | Strongly Disagree | 2         | .2      | 1.6           | 1.6                |
|            |         | Disagree          | 4         | .4      | 3.1           | 4.7                |
|            |         | Neither           | 1         | .1      | .8            | 5.5                |
|            |         | Agree             | 67        | 6.7     | 52.8          | 58.3               |
|            |         | Strongly Agree    | 53        | 5.3     | 41.7          | 100.0              |
|            | Total   | 127               | 12.6      | 100.0   |               |                    |
| Missing    | System  | 880               | 87.4      |         |               |                    |

|                   |         |                   |        |       |       |       |
|-------------------|---------|-------------------|--------|-------|-------|-------|
|                   | Total   |                   | 1007   | 100.0 |       |       |
| Dublin North East | Valid   | Strongly Disagree | 5      | .5    | 3.4   | 3.4   |
|                   |         | Disagree          | 3      | .3    | 2.0   | 5.4   |
|                   |         | Neither           | 3      | .3    | 2.0   | 7.4   |
|                   |         | Agree             | 68     | 6.8   | 45.9  | 53.4  |
|                   |         | Strongly Agree    | 69     | 6.9   | 46.6  | 100.0 |
|                   | Total   |                   | 148    | 14.8  | 100.0 |       |
|                   | Missing | System            | 853    | 85.2  |       |       |
|                   | Total   |                   | 1001   | 100.0 |       |       |
| Dublin Midlands   | Valid   | Strongly Disagree | 3      | .3    | 1.9   | 1.9   |
|                   |         | Disagree          | 2      | .2    | 1.3   | 3.2   |
|                   |         | Neither           | 2      | .2    | 1.3   | 4.5   |
|                   |         | Agree             | 72     | 7.1   | 46.5  | 51.0  |
|                   |         | Strongly Agree    | 76     | 7.5   | 49.0  | 100.0 |
|                   | Total   |                   | 155    | 15.4  | 100.0 |       |
|                   | Missing | System            | 853    | 84.6  |       |       |
|                   | Total   |                   | 1008   | 100.0 |       |       |
| Dublin South      | Valid   | Strongly Disagree | 4      | .4    | 2.5   | 2.5   |
|                   |         | Disagree          | 10     | 1.0   | 6.1   | 8.6   |
|                   |         | Agree             | 70     | 7.0   | 42.9  | 51.5  |
|                   |         | Strongly Agree    | 79     | 7.9   | 48.5  | 100.0 |
|                   |         | Total             |        | 163   | 16.3  | 100.0 |
|                   |         | Missing           | System | 839   | 83.7  |       |
|                   | Total   |                   | 1002   | 100.0 |       |       |

**Entry3 - I felt sometimes I had ended up in the wrong place.**

| Region     |         |                   | Frequency | Percent | Valid Percent | Cumulative Percent |
|------------|---------|-------------------|-----------|---------|---------------|--------------------|
| South      | Valid   | Strongly Disagree | 53        | 5.3     | 36.1          | 36.1               |
|            |         | Disagree          | 72        | 7.2     | 49.0          | 85.0               |
|            |         | Neither           | 4         | .4      | 2.7           | 87.8               |
|            |         | Agree             | 14        | 1.4     | 9.5           | 97.3               |
|            |         | Strongly Agree    | 4         | .4      | 2.7           | 100.0              |
|            |         | Total             | 147       | 14.7    | 100.0         |                    |
|            | Missing | System            | 856       | 85.3    |               |                    |
| Total      |         |                   | 1003      | 100.0   |               |                    |
| Mid-West   | Valid   | Strongly Disagree | 44        | 4.4     | 28.4          | 28.4               |
|            |         | Disagree          | 85        | 8.6     | 54.8          | 83.2               |
|            |         | Neither           | 1         | .1      | .6            | 83.9               |
|            |         | Agree             | 19        | 1.9     | 12.3          | 96.1               |
|            |         | Strongly Agree    | 6         | .6      | 3.9           | 100.0              |
|            |         | Total             | 155       | 15.6    | 100.0         |                    |
|            | Missing | System            | 837       | 84.4    |               |                    |
| Total      |         |                   | 992       | 100.0   |               |                    |
| South East | Valid   | Strongly Disagree | 44        | 4.4     | 31.9          | 31.9               |
|            |         | Disagree          | 76        | 7.6     | 55.1          | 87.0               |
|            |         | Neither           | 1         | .1      | .7            | 87.7               |
|            |         | Agree             | 13        | 1.3     | 9.4           | 97.1               |
|            |         | Strongly Agree    | 4         | .4      | 2.9           | 100.0              |
|            |         | Total             | 138       | 13.9    | 100.0         |                    |
|            | Missing | System            | 858       | 86.1    |               |                    |
| Total      |         |                   | 996       | 100.0   |               |                    |
| North East | Valid   | Strongly Disagree | 58        | 5.8     | 36.0          | 36.0               |
|            |         | Disagree          | 80        | 8.1     | 49.7          | 85.7               |
|            |         | Neither           | 2         | .2      | 1.2           | 87.0               |
|            |         | Agree             | 13        | 1.3     | 8.1           | 95.0               |
|            |         | Strongly Agree    | 8         | .8      | 5.0           | 100.0              |
|            |         | Total             | 161       | 16.2    | 100.0         |                    |
|            | Missing | System            | 832       | 83.8    |               |                    |
| Total      |         |                   | 993       | 100.0   |               |                    |
| West       | Valid   | Strongly Disagree | 39        | 3.9     | 31.2          | 31.2               |
|            |         | Disagree          | 71        | 7.1     | 56.8          | 88.0               |
|            |         | Neither           | 1         | .1      | .8            | 88.8               |
|            |         | Agree             | 11        | 1.1     | 8.8           | 97.6               |
|            |         | Strongly Agree    | 3         | .3      | 2.4           | 100.0              |

|                   |         |                   |        |       |       |       |
|-------------------|---------|-------------------|--------|-------|-------|-------|
|                   |         | Total             | 125    | 12.4  | 100.0 |       |
|                   | Missing | System            | 882    | 87.6  |       |       |
|                   |         | Total             | 1007   | 100.0 |       |       |
| Dublin North East | Valid   | Strongly Disagree | 48     | 4.8   | 32.4  | 32.4  |
|                   |         | Disagree          | 73     | 7.3   | 49.3  | 81.8  |
|                   |         | Neither           | 5      | .5    | 3.4   | 85.1  |
|                   |         | Agree             | 14     | 1.4   | 9.5   | 94.6  |
|                   |         | Strongly Agree    | 8      | .8    | 5.4   | 100.0 |
|                   |         | Total             | 148    | 14.8  | 100.0 |       |
|                   | Missing | System            | 853    | 85.2  |       |       |
|                   |         | Total             | 1001   | 100.0 |       |       |
| Dublin Midlands   | Valid   | Strongly Disagree | 58     | 5.8   | 37.4  | 37.4  |
|                   |         | Disagree          | 74     | 7.3   | 47.7  | 85.2  |
|                   |         | Agree             | 18     | 1.8   | 11.6  | 96.8  |
|                   |         | Strongly Agree    | 5      | .5    | 3.2   | 100.0 |
|                   |         | Total             | 155    | 15.4  | 100.0 |       |
|                   |         | Missing           | System | 853   | 84.6  |       |
|                   |         | Total             | 1008   | 100.0 |       |       |
| Dublin South      | Valid   | Strongly Disagree | 63     | 6.3   | 39.6  | 39.6  |
|                   |         | Disagree          | 75     | 7.5   | 47.2  | 86.8  |
|                   |         | Neither           | 4      | .4    | 2.5   | 89.3  |
|                   |         | Agree             | 13     | 1.3   | 8.2   | 97.5  |
|                   |         | Strongly Agree    | 4      | .4    | 2.5   | 100.0 |
|                   |         | Total             | 159    | 15.9  | 100.0 |       |
|                   | Missing | System            | 843    | 84.1  |       |       |
|                   | Total   | 1002              | 100.0  |       |       |       |

**PatientConvenience1 - Travelling to the services I needed was easy.**

| Region     |         |                   | Frequency | Percent | Valid Percent | Cumulative Percent |
|------------|---------|-------------------|-----------|---------|---------------|--------------------|
| South      | Valid   | Strongly Disagree | 3         | .3      | 2.1           | 2.1                |
|            |         | Disagree          | 10        | 1.0     | 6.8           | 8.9                |
|            |         | Neither           | 2         | .2      | 1.4           | 10.3               |
|            |         | Agree             | 76        | 7.6     | 52.1          | 62.3               |
|            |         | Strongly Agree    | 55        | 5.5     | 37.7          | 100.0              |
|            |         | Total             | 146       | 14.6    | 100.0         |                    |
|            | Missing | System            | 857       | 85.4    |               |                    |
| Total      |         |                   | 1003      | 100.0   |               |                    |
| Mid-West   | Valid   | Strongly Disagree | 4         | .4      | 2.6           | 2.6                |
|            |         | Disagree          | 11        | 1.1     | 7.2           | 9.8                |
|            |         | Neither           | 5         | .5      | 3.3           | 13.1               |
|            |         | Agree             | 82        | 8.3     | 53.6          | 66.7               |
|            |         | Strongly Agree    | 51        | 5.1     | 33.3          | 100.0              |
|            |         | Total             | 153       | 15.4    | 100.0         |                    |
|            | Missing | System            | 839       | 84.6    |               |                    |
| Total      |         |                   | 992       | 100.0   |               |                    |
| South East | Valid   | Strongly Disagree | 3         | .3      | 2.2           | 2.2                |
|            |         | Disagree          | 8         | .8      | 5.8           | 8.0                |
|            |         | Agree             | 89        | 8.9     | 65.0          | 73.0               |
|            |         | Strongly Agree    | 37        | 3.7     | 27.0          | 100.0              |
|            |         | Total             | 137       | 13.8    | 100.0         |                    |
|            |         | Missing           | System    | 859     | 86.2          |                    |
|            | Total   |                   |           | 996     | 100.0         |                    |
| North East | Valid   | Strongly Disagree | 11        | 1.1     | 6.9           | 6.9                |
|            |         | Disagree          | 11        | 1.1     | 6.9           | 13.8               |
|            |         | Neither           | 1         | .1      | .6            | 14.4               |
|            |         | Agree             | 81        | 8.2     | 50.6          | 65.0               |
|            |         | Strongly Agree    | 56        | 5.6     | 35.0          | 100.0              |
|            |         | Total             | 160       | 16.1    | 100.0         |                    |
|            | Missing | System            | 833       | 83.9    |               |                    |
| Total      |         |                   | 993       | 100.0   |               |                    |
| West       | Valid   | Strongly Disagree | 7         | .7      | 5.6           | 5.6                |
|            |         | Disagree          | 16        | 1.6     | 12.7          | 18.3               |
|            |         | Neither           | 2         | .2      | 1.6           | 19.8               |
|            |         | Agree             | 59        | 5.9     | 46.8          | 66.7               |
|            |         | Strongly Agree    | 42        | 4.2     | 33.3          | 100.0              |
|            |         | Total             | 126       | 12.5    | 100.0         |                    |



|                   |         |                   |      |       |       |       |
|-------------------|---------|-------------------|------|-------|-------|-------|
|                   | Missing | System            | 881  | 87.5  |       |       |
|                   | Total   |                   | 1007 | 100.0 |       |       |
| Dublin North East | Valid   | Strongly Disagree | 5    | .5    | 3.4   | 3.4   |
|                   |         | Disagree          | 17   | 1.7   | 11.6  | 15.1  |
|                   |         | Neither           | 2    | .2    | 1.4   | 16.4  |
|                   |         | Agree             | 75   | 7.5   | 51.4  | 67.8  |
|                   |         | Strongly Agree    | 47   | 4.7   | 32.2  | 100.0 |
|                   | Total   |                   | 146  | 14.6  | 100.0 |       |
|                   | Missing | System            | 855  | 85.4  |       |       |
|                   | Total   |                   | 1001 | 100.0 |       |       |
| Dublin Midlands   | Valid   | Strongly Disagree | 5    | .5    | 3.3   | 3.3   |
|                   |         | Disagree          | 8    | .8    | 5.2   | 8.5   |
|                   |         | Neither           | 2    | .2    | 1.3   | 9.8   |
|                   |         | Agree             | 77   | 7.6   | 50.3  | 60.1  |
|                   |         | Strongly Agree    | 61   | 6.1   | 39.9  | 100.0 |
|                   | Total   |                   | 153  | 15.2  | 100.0 |       |
|                   | Missing | System            | 855  | 84.8  |       |       |
|                   | Total   |                   | 1008 | 100.0 |       |       |
| Dublin South      | Valid   | Strongly Disagree | 8    | .8    | 4.9   | 4.9   |
|                   |         | Disagree          | 9    | .9    | 5.6   | 10.5  |
|                   |         | Neither           | 5    | .5    | 3.1   | 13.6  |
|                   |         | Agree             | 78   | 7.8   | 48.1  | 61.7  |
|                   |         | Strongly Agree    | 62   | 6.2   | 38.3  | 100.0 |
|                   | Total   |                   | 162  | 16.2  | 100.0 |       |
|                   | Missing | System            | 840  | 83.8  |       |       |
|                   | Total   |                   | 1002 | 100.0 |       |       |

**PatientConvenience2 - I was told how long I'd have to wait.**

| Region     |         |                   | Frequency | Percent | Valid Percent | Cumulative Percent |
|------------|---------|-------------------|-----------|---------|---------------|--------------------|
| South      | Valid   | Strongly Disagree | 16        | 1.6     | 11.2          | 11.2               |
|            |         | Disagree          | 38        | 3.8     | 26.6          | 37.8               |
|            |         | Neither           | 7         | .7      | 4.9           | 42.7               |
|            |         | Agree             | 47        | 4.7     | 32.9          | 75.5               |
|            |         | Strongly Agree    | 35        | 3.5     | 24.5          | 100.0              |
|            |         | Total             | 143       | 14.3    | 100.0         |                    |
|            | Missing | System            | 860       | 85.7    |               |                    |
| Total      |         |                   | 1003      | 100.0   |               |                    |
| Mid-West   | Valid   | Strongly Disagree | 27        | 2.7     | 18.5          | 18.5               |
|            |         | Disagree          | 30        | 3.0     | 20.5          | 39.0               |
|            |         | Neither           | 3         | .3      | 2.1           | 41.1               |
|            |         | Agree             | 64        | 6.5     | 43.8          | 84.9               |
|            |         | Strongly Agree    | 22        | 2.2     | 15.1          | 100.0              |
|            |         | Total             | 146       | 14.7    | 100.0         |                    |
|            | Missing | System            | 846       | 85.3    |               |                    |
| Total      |         |                   | 992       | 100.0   |               |                    |
| South East | Valid   | Strongly Disagree | 18        | 1.8     | 13.6          | 13.6               |
|            |         | Disagree          | 47        | 4.7     | 35.6          | 49.2               |
|            |         | Neither           | 5         | .5      | 3.8           | 53.0               |
|            |         | Agree             | 46        | 4.6     | 34.8          | 87.9               |
|            |         | Strongly Agree    | 16        | 1.6     | 12.1          | 100.0              |
|            |         | Total             | 132       | 13.3    | 100.0         |                    |
|            | Missing | System            | 864       | 86.7    |               |                    |
| Total      |         |                   | 996       | 100.0   |               |                    |
| North East | Valid   | Strongly Disagree | 25        | 2.5     | 16.1          | 16.1               |
|            |         | Disagree          | 30        | 3.0     | 19.4          | 35.5               |
|            |         | Neither           | 5         | .5      | 3.2           | 38.7               |
|            |         | Agree             | 65        | 6.5     | 41.9          | 80.6               |
|            |         | Strongly Agree    | 30        | 3.0     | 19.4          | 100.0              |
|            |         | Total             | 155       | 15.6    | 100.0         |                    |
|            | Missing | System            | 838       | 84.4    |               |                    |
| Total      |         |                   | 993       | 100.0   |               |                    |
| West       | Valid   | Strongly Disagree | 23        | 2.3     | 19.0          | 19.0               |
|            |         | Disagree          | 26        | 2.6     | 21.5          | 40.5               |
|            |         | Neither           | 7         | .7      | 5.8           | 46.3               |
|            |         | Agree             | 48        | 4.8     | 39.7          | 86.0               |
|            |         | Strongly Agree    | 17        | 1.7     | 14.0          | 100.0              |

|                   |         |                   |      |       |       |       |
|-------------------|---------|-------------------|------|-------|-------|-------|
|                   |         | Total             | 121  | 12.0  | 100.0 |       |
|                   | Missing | System            | 886  | 88.0  |       |       |
|                   |         | Total             | 1007 | 100.0 |       |       |
| Dublin North East | Valid   | Strongly Disagree | 13   | 1.3   | 9.8   | 9.8   |
|                   |         | Disagree          | 36   | 3.6   | 27.3  | 37.1  |
|                   |         | Neither           | 4    | .4    | 3.0   | 40.2  |
|                   |         | Agree             | 55   | 5.5   | 41.7  | 81.8  |
|                   |         | Strongly Agree    | 24   | 2.4   | 18.2  | 100.0 |
|                   |         | Total             | 132  | 13.2  | 100.0 |       |
|                   | Missing | System            | 869  | 86.8  |       |       |
|                   |         | Total             | 1001 | 100.0 |       |       |
| Dublin Midlands   | Valid   | Strongly Disagree | 22   | 2.2   | 15.3  | 15.3  |
|                   |         | Disagree          | 34   | 3.4   | 23.6  | 38.9  |
|                   |         | Neither           | 5    | .5    | 3.5   | 42.4  |
|                   |         | Agree             | 60   | 6.0   | 41.7  | 84.0  |
|                   |         | Strongly Agree    | 23   | 2.3   | 16.0  | 100.0 |
|                   |         | Total             | 144  | 14.3  | 100.0 |       |
|                   | Missing | System            | 864  | 85.7  |       |       |
|                   |         | Total             | 1008 | 100.0 |       |       |
| Dublin South      | Valid   | Strongly Disagree | 17   | 1.7   | 11.1  | 11.1  |
|                   |         | Disagree          | 38   | 3.8   | 24.8  | 35.9  |
|                   |         | Neither           | 8    | .8    | 5.2   | 41.2  |
|                   |         | Agree             | 59   | 5.9   | 38.6  | 79.7  |
|                   |         | Strongly Agree    | 31   | 3.1   | 20.3  | 100.0 |
|                   |         | Total             | 153  | 15.3  | 100.0 |       |
|                   | Missing | System            | 849  | 84.7  |       |       |
|                   |         | Total             | 1002 | 100.0 |       |       |

**PatientConvenience3 - Services had the information they needed about me.**

| Region     |         |                   | Frequency | Percent | Valid Percent | Cumulative Percent |
|------------|---------|-------------------|-----------|---------|---------------|--------------------|
| South      | Valid   | Strongly Disagree | 5         | .5      | 3.4           | 3.4                |
|            |         | Disagree          | 17        | 1.7     | 11.6          | 15.1               |
|            |         | Neither           | 4         | .4      | 2.7           | 17.8               |
|            |         | Agree             | 66        | 6.6     | 45.2          | 63.0               |
|            |         | Strongly Agree    | 54        | 5.4     | 37.0          | 100.0              |
|            |         | Total             | 146       | 14.6    | 100.0         |                    |
|            | Missing | System            | 857       | 85.4    |               |                    |
| Total      |         |                   | 1003      | 100.0   |               |                    |
| Mid-West   | Valid   | Strongly Disagree | 9         | .9      | 6.0           | 6.0                |
|            |         | Disagree          | 16        | 1.6     | 10.7          | 16.7               |
|            |         | Neither           | 4         | .4      | 2.7           | 19.3               |
|            |         | Agree             | 74        | 7.5     | 49.3          | 68.7               |
|            |         | Strongly Agree    | 47        | 4.7     | 31.3          | 100.0              |
|            |         | Total             | 150       | 15.1    | 100.0         |                    |
|            | Missing | System            | 842       | 84.9    |               |                    |
| Total      |         |                   | 992       | 100.0   |               |                    |
| South East | Valid   | Strongly Disagree | 3         | .3      | 2.2           | 2.2                |
|            |         | Disagree          | 19        | 1.9     | 13.8          | 15.9               |
|            |         | Neither           | 2         | .2      | 1.4           | 17.4               |
|            |         | Agree             | 71        | 7.1     | 51.4          | 68.8               |
|            |         | Strongly Agree    | 43        | 4.3     | 31.2          | 100.0              |
|            |         | Total             | 138       | 13.9    | 100.0         |                    |
|            | Missing | System            | 858       | 86.1    |               |                    |
| Total      |         |                   | 996       | 100.0   |               |                    |
| North East | Valid   | Strongly Disagree | 6         | .6      | 3.7           | 3.7                |
|            |         | Disagree          | 12        | 1.2     | 7.4           | 11.1               |
|            |         | Neither           | 4         | .4      | 2.5           | 13.6               |
|            |         | Agree             | 89        | 9.0     | 54.9          | 68.5               |
|            |         | Strongly Agree    | 51        | 5.1     | 31.5          | 100.0              |
|            |         | Total             | 162       | 16.3    | 100.0         |                    |
|            | Missing | System            | 831       | 83.7    |               |                    |
| Total      |         |                   | 993       | 100.0   |               |                    |
| West       | Valid   | Strongly Disagree | 5         | .5      | 4.0           | 4.0                |
|            |         | Disagree          | 12        | 1.2     | 9.7           | 13.7               |
|            |         | Neither           | 1         | .1      | .8            | 14.5               |
|            |         | Agree             | 66        | 6.6     | 53.2          | 67.7               |
|            |         | Strongly Agree    | 40        | 4.0     | 32.3          | 100.0              |

|                   |         |                   |      |       |       |       |
|-------------------|---------|-------------------|------|-------|-------|-------|
|                   |         | Total             | 124  | 12.3  | 100.0 |       |
|                   | Missing | System            | 883  | 87.7  |       |       |
|                   |         | Total             | 1007 | 100.0 |       |       |
| Dublin North East | Valid   | Strongly Disagree | 5    | .5    | 3.4   | 3.4   |
|                   |         | Disagree          | 25   | 2.5   | 17.2  | 20.7  |
|                   |         | Neither           | 6    | .6    | 4.1   | 24.8  |
|                   |         | Agree             | 65   | 6.5   | 44.8  | 69.7  |
|                   |         | Strongly Agree    | 44   | 4.4   | 30.3  | 100.0 |
|                   |         | Total             | 145  | 14.5  | 100.0 |       |
|                   | Missing | System            | 856  | 85.5  |       |       |
|                   |         | Total             | 1001 | 100.0 |       |       |
| Dublin Midlands   | Valid   | Strongly Disagree | 6    | .6    | 3.9   | 3.9   |
|                   |         | Disagree          | 20   | 2.0   | 13.2  | 17.1  |
|                   |         | Neither           | 3    | .3    | 2.0   | 19.1  |
|                   |         | Agree             | 69   | 6.8   | 45.4  | 64.5  |
|                   |         | Strongly Agree    | 54   | 5.4   | 35.5  | 100.0 |
|                   |         | Total             | 152  | 15.1  | 100.0 |       |
|                   | Missing | System            | 856  | 84.9  |       |       |
|                   |         | Total             | 1008 | 100.0 |       |       |
| Dublin South      | Valid   | Strongly Disagree | 5    | .5    | 3.1   | 3.1   |
|                   |         | Disagree          | 19   | 1.9   | 11.8  | 14.9  |
|                   |         | Neither           | 8    | .8    | 5.0   | 19.9  |
|                   |         | Agree             | 77   | 7.7   | 47.8  | 67.7  |
|                   |         | Strongly Agree    | 52   | 5.2   | 32.3  | 100.0 |
|                   |         | Total             | 161  | 16.1  | 100.0 |       |
|                   | Missing | System            | 841  | 83.9  |       |       |
|                   |         | Total             | 1002 | 100.0 |       |       |

**PatientConvenience4 - I had to repeat myself too many times.**

| Region     |         |                   | Frequency | Percent | Valid Percent | Cumulative Percent |
|------------|---------|-------------------|-----------|---------|---------------|--------------------|
| South      | Valid   | Strongly Disagree | 40        | 4.0     | 27.4          | 27.4               |
|            |         | Disagree          | 75        | 7.5     | 51.4          | 78.8               |
|            |         | Neither           | 5         | .5      | 3.4           | 82.2               |
|            |         | Agree             | 19        | 1.9     | 13.0          | 95.2               |
|            |         | Strongly Agree    | 7         | .7      | 4.8           | 100.0              |
|            |         | Total             | 146       | 14.6    | 100.0         |                    |
|            | Missing | System            | 857       | 85.4    |               |                    |
| Total      |         |                   | 1003      | 100.0   |               |                    |
| Mid-West   | Valid   | Strongly Disagree | 44        | 4.4     | 28.9          | 28.9               |
|            |         | Disagree          | 65        | 6.6     | 42.8          | 71.7               |
|            |         | Neither           | 6         | .6      | 3.9           | 75.7               |
|            |         | Agree             | 28        | 2.8     | 18.4          | 94.1               |
|            |         | Strongly Agree    | 9         | .9      | 5.9           | 100.0              |
|            |         | Total             | 152       | 15.3    | 100.0         |                    |
|            | Missing | System            | 840       | 84.7    |               |                    |
| Total      |         |                   | 992       | 100.0   |               |                    |
| South East | Valid   | Strongly Disagree | 33        | 3.3     | 23.9          | 23.9               |
|            |         | Disagree          | 80        | 8.0     | 58.0          | 81.9               |
|            |         | Neither           | 4         | .4      | 2.9           | 84.8               |
|            |         | Agree             | 15        | 1.5     | 10.9          | 95.7               |
|            |         | Strongly Agree    | 6         | .6      | 4.3           | 100.0              |
|            |         | Total             | 138       | 13.9    | 100.0         |                    |
|            | Missing | System            | 858       | 86.1    |               |                    |
| Total      |         |                   | 996       | 100.0   |               |                    |
| North East | Valid   | Strongly Disagree | 54        | 5.4     | 32.9          | 32.9               |
|            |         | Disagree          | 74        | 7.5     | 45.1          | 78.0               |
|            |         | Neither           | 4         | .4      | 2.4           | 80.5               |
|            |         | Agree             | 21        | 2.1     | 12.8          | 93.3               |
|            |         | Strongly Agree    | 11        | 1.1     | 6.7           | 100.0              |
|            |         | Total             | 164       | 16.5    | 100.0         |                    |
|            | Missing | System            | 829       | 83.5    |               |                    |
| Total      |         |                   | 993       | 100.0   |               |                    |
| West       | Valid   | Strongly Disagree | 34        | 3.4     | 27.0          | 27.0               |
|            |         | Disagree          | 65        | 6.5     | 51.6          | 78.6               |
|            |         | Neither           | 1         | .1      | .8            | 79.4               |
|            |         | Agree             | 16        | 1.6     | 12.7          | 92.1               |
|            |         | Strongly Agree    | 10        | 1.0     | 7.9           | 100.0              |

|                   |         |                   |      |       |       |       |
|-------------------|---------|-------------------|------|-------|-------|-------|
|                   |         | Total             | 126  | 12.5  | 100.0 |       |
|                   | Missing | System            | 881  | 87.5  |       |       |
|                   |         | Total             | 1007 | 100.0 |       |       |
| Dublin North East | Valid   | Strongly Disagree | 40   | 4.0   | 27.4  | 27.4  |
|                   |         | Disagree          | 75   | 7.5   | 51.4  | 78.8  |
|                   |         | Neither           | 3    | .3    | 2.1   | 80.8  |
|                   |         | Agree             | 20   | 2.0   | 13.7  | 94.5  |
|                   |         | Strongly Agree    | 8    | .8    | 5.5   | 100.0 |
|                   |         | Total             | 146  | 14.6  | 100.0 |       |
|                   | Missing | System            | 855  | 85.4  |       |       |
|                   |         | Total             | 1001 | 100.0 |       |       |
| Dublin Midlands   | Valid   | Strongly Disagree | 52   | 5.2   | 34.0  | 34.0  |
|                   |         | Disagree          | 68   | 6.7   | 44.4  | 78.4  |
|                   |         | Neither           | 1    | .1    | .7    | 79.1  |
|                   |         | Agree             | 18   | 1.8   | 11.8  | 90.8  |
|                   |         | Strongly Agree    | 14   | 1.4   | 9.2   | 100.0 |
|                   |         | Total             | 153  | 15.2  | 100.0 |       |
|                   | Missing | System            | 855  | 84.8  |       |       |
|                   |         | Total             | 1008 | 100.0 |       |       |
| Dublin South      | Valid   | Strongly Disagree | 56   | 5.6   | 34.6  | 34.6  |
|                   |         | Disagree          | 73   | 7.3   | 45.1  | 79.6  |
|                   |         | Neither           | 6    | .6    | 3.7   | 83.3  |
|                   |         | Agree             | 19   | 1.9   | 11.7  | 95.1  |
|                   |         | Strongly Agree    | 8    | .8    | 4.9   | 100.0 |
|                   |         | Total             | 162  | 16.2  | 100.0 |       |
|                   | Missing | System            | 840  | 83.8  |       |       |
|                   |         | Total             | 1002 | 100.0 |       |       |

**PatientConvenience5 - Services understood that I had responsibilities, like my need to look after my family.**

| Region     |         |                   | Frequency | Percent | Valid Percent | Cumulative Percent |
|------------|---------|-------------------|-----------|---------|---------------|--------------------|
| South      | Valid   | Strongly Disagree | 5         | .5      | 4.0           | 4.0                |
|            |         | Disagree          | 6         | .6      | 4.8           | 8.7                |
|            |         | Neither           | 13        | 1.3     | 10.3          | 19.0               |
|            |         | Agree             | 72        | 7.2     | 57.1          | 76.2               |
|            |         | Strongly Agree    | 30        | 3.0     | 23.8          | 100.0              |
|            |         | Total             | 126       | 12.6    | 100.0         |                    |
|            | Missing | System            | 877       | 87.4    |               |                    |
| Total      |         |                   | 1003      | 100.0   |               |                    |
| Mid-West   | Valid   | Strongly Disagree | 3         | .3      | 2.1           | 2.1                |
|            |         | Disagree          | 18        | 1.8     | 12.9          | 15.0               |
|            |         | Neither           | 10        | 1.0     | 7.1           | 22.1               |
|            |         | Agree             | 77        | 7.8     | 55.0          | 77.1               |
|            |         | Strongly Agree    | 32        | 3.2     | 22.9          | 100.0              |
|            |         | Total             | 140       | 14.1    | 100.0         |                    |
|            | Missing | System            | 852       | 85.9    |               |                    |
| Total      |         |                   | 992       | 100.0   |               |                    |
| South East | Valid   | Strongly Disagree | 7         | .7      | 5.8           | 5.8                |
|            |         | Disagree          | 16        | 1.6     | 13.3          | 19.2               |
|            |         | Neither           | 8         | .8      | 6.7           | 25.8               |
|            |         | Agree             | 70        | 7.0     | 58.3          | 84.2               |
|            |         | Strongly Agree    | 19        | 1.9     | 15.8          | 100.0              |
|            |         | Total             | 120       | 12.0    | 100.0         |                    |
|            | Missing | System            | 876       | 88.0    |               |                    |
| Total      |         |                   | 996       | 100.0   |               |                    |
| North East | Valid   | Strongly Disagree | 5         | .5      | 3.5           | 3.5                |
|            |         | Disagree          | 12        | 1.2     | 8.5           | 12.0               |
|            |         | Neither           | 8         | .8      | 5.6           | 17.6               |
|            |         | Agree             | 74        | 7.5     | 52.1          | 69.7               |
|            |         | Strongly Agree    | 43        | 4.3     | 30.3          | 100.0              |
|            |         | Total             | 142       | 14.3    | 100.0         |                    |
|            | Missing | System            | 851       | 85.7    |               |                    |
| Total      |         |                   | 993       | 100.0   |               |                    |
| West       | Valid   | Strongly Disagree | 5         | .5      | 4.4           | 4.4                |
|            |         | Disagree          | 15        | 1.5     | 13.3          | 17.7               |
|            |         | Neither           | 3         | .3      | 2.7           | 20.4               |
|            |         | Agree             | 62        | 6.2     | 54.9          | 75.2               |
|            |         | Strongly Agree    | 28        | 2.8     | 24.8          | 100.0              |



|                   |         |                   |      |       |       |       |
|-------------------|---------|-------------------|------|-------|-------|-------|
|                   |         | Total             | 113  | 11.2  | 100.0 |       |
|                   | Missing | System            | 894  | 88.8  |       |       |
|                   |         | Total             | 1007 | 100.0 |       |       |
| Dublin North East | Valid   | Strongly Disagree | 8    | .8    | 6.2   | 6.2   |
|                   |         | Disagree          | 16   | 1.6   | 12.3  | 18.5  |
|                   |         | Neither           | 8    | .8    | 6.2   | 24.6  |
|                   |         | Agree             | 60   | 6.0   | 46.2  | 70.8  |
|                   |         | Strongly Agree    | 38   | 3.8   | 29.2  | 100.0 |
|                   |         | Total             | 130  | 13.0  | 100.0 |       |
|                   | Missing | System            | 871  | 87.0  |       |       |
|                   |         | Total             | 1001 | 100.0 |       |       |
| Dublin Midlands   | Valid   | Strongly Disagree | 5    | .5    | 3.7   | 3.7   |
|                   |         | Disagree          | 17   | 1.7   | 12.6  | 16.3  |
|                   |         | Neither           | 9    | .9    | 6.7   | 23.0  |
|                   |         | Agree             | 65   | 6.4   | 48.1  | 71.1  |
|                   |         | Strongly Agree    | 39   | 3.9   | 28.9  | 100.0 |
|                   |         | Total             | 135  | 13.4  | 100.0 |       |
|                   | Missing | System            | 873  | 86.6  |       |       |
|                   |         | Total             | 1008 | 100.0 |       |       |
| Dublin South      | Valid   | Strongly Disagree | 3    | .3    | 2.2   | 2.2   |
|                   |         | Disagree          | 9    | .9    | 6.7   | 9.0   |
|                   |         | Neither           | 14   | 1.4   | 10.4  | 19.4  |
|                   |         | Agree             | 73   | 7.3   | 54.5  | 73.9  |
|                   |         | Strongly Agree    | 35   | 3.5   | 26.1  | 100.0 |
|                   |         | Total             | 134  | 13.4  | 100.0 |       |
|                   | Missing | System            | 868  | 86.6  |       |       |
|                   |         | Total             | 1002 | 100.0 |       |       |

**Progress1 - My concerns were taken seriously by everyone.**

| Region     |         |                   | Frequency | Percent | Valid Percent | Cumulative Percent |
|------------|---------|-------------------|-----------|---------|---------------|--------------------|
| South      | Valid   | Strongly Disagree | 1         | .1      | .7            | .7                 |
|            |         | Disagree          | 9         | .9      | 6.1           | 6.8                |
|            |         | Neither           | 3         | .3      | 2.0           | 8.8                |
|            |         | Agree             | 71        | 7.1     | 48.3          | 57.1               |
|            |         | Strongly Agree    | 63        | 6.3     | 42.9          | 100.0              |
|            |         | Total             | 147       | 14.7    | 100.0         |                    |
|            | Missing | System            | 856       | 85.3    |               |                    |
| Total      |         |                   | 1003      | 100.0   |               |                    |
| Mid-West   | Valid   | Strongly Disagree | 3         | .3      | 1.9           | 1.9                |
|            |         | Disagree          | 10        | 1.0     | 6.5           | 8.4                |
|            |         | Neither           | 2         | .2      | 1.3           | 9.7                |
|            |         | Agree             | 79        | 8.0     | 51.0          | 60.6               |
|            |         | Strongly Agree    | 61        | 6.1     | 39.4          | 100.0              |
|            |         | Total             | 155       | 15.6    | 100.0         |                    |
|            | Missing | System            | 837       | 84.4    |               |                    |
| Total      |         |                   | 992       | 100.0   |               |                    |
| South East | Valid   | Strongly Disagree | 4         | .4      | 2.9           | 2.9                |
|            |         | Disagree          | 9         | .9      | 6.5           | 9.4                |
|            |         | Neither           | 2         | .2      | 1.4           | 10.8               |
|            |         | Agree             | 78        | 7.8     | 56.1          | 66.9               |
|            |         | Strongly Agree    | 46        | 4.6     | 33.1          | 100.0              |
|            |         | Total             | 139       | 14.0    | 100.0         |                    |
|            | Missing | System            | 857       | 86.0    |               |                    |
| Total      |         |                   | 996       | 100.0   |               |                    |
| North East | Valid   | Strongly Disagree | 4         | .4      | 2.4           | 2.4                |
|            |         | Disagree          | 16        | 1.6     | 9.7           | 12.1               |
|            |         | Neither           | 1         | .1      | .6            | 12.7               |
|            |         | Agree             | 81        | 8.2     | 49.1          | 61.8               |
|            |         | Strongly Agree    | 63        | 6.3     | 38.2          | 100.0              |
|            |         | Total             | 165       | 16.6    | 100.0         |                    |
|            | Missing | System            | 828       | 83.4    |               |                    |
| Total      |         |                   | 993       | 100.0   |               |                    |
| West       | Valid   | Strongly Disagree | 3         | .3      | 2.4           | 2.4                |
|            |         | Disagree          | 8         | .8      | 6.3           | 8.7                |
|            |         | Agree             | 73        | 7.2     | 57.5          | 66.1               |
|            |         | Strongly Agree    | 43        | 4.3     | 33.9          | 100.0              |
|            |         | Total             | 127       | 12.6    | 100.0         |                    |

|                   |         |                   |      |       |       |       |
|-------------------|---------|-------------------|------|-------|-------|-------|
|                   | Missing | System            | 880  | 87.4  |       |       |
|                   | Total   |                   | 1007 | 100.0 |       |       |
| Dublin North East | Valid   | Strongly Disagree | 3    | .3    | 2.0   | 2.0   |
|                   |         | Disagree          | 12   | 1.2   | 8.1   | 10.1  |
|                   |         | Neither           | 5    | .5    | 3.4   | 13.5  |
|                   |         | Agree             | 76   | 7.6   | 51.4  | 64.9  |
|                   |         | Strongly Agree    | 52   | 5.2   | 35.1  | 100.0 |
|                   | Total   |                   | 148  | 14.8  | 100.0 |       |
|                   | Missing | System            | 853  | 85.2  |       |       |
|                   | Total   |                   | 1001 | 100.0 |       |       |
| Dublin Midlands   | Valid   | Strongly Disagree | 4    | .4    | 2.6   | 2.6   |
|                   |         | Disagree          | 8    | .8    | 5.1   | 7.7   |
|                   |         | Neither           | 1    | .1    | .6    | 8.3   |
|                   |         | Agree             | 75   | 7.4   | 48.1  | 56.4  |
|                   |         | Strongly Agree    | 68   | 6.7   | 43.6  | 100.0 |
|                   | Total   |                   | 156  | 15.5  | 100.0 |       |
|                   | Missing | System            | 852  | 84.5  |       |       |
|                   | Total   |                   | 1008 | 100.0 |       |       |
| Dublin South      | Valid   | Strongly Disagree | 1    | .1    | .6    | .6    |
|                   |         | Disagree          | 9    | .9    | 5.5   | 6.1   |
|                   |         | Neither           | 2    | .2    | 1.2   | 7.4   |
|                   |         | Agree             | 93   | 9.3   | 57.1  | 64.4  |
|                   |         | Strongly Agree    | 58   | 5.8   | 35.6  | 100.0 |
|                   | Total   |                   | 163  | 16.3  | 100.0 |       |
|                   | Missing | System            | 839  | 83.7  |       |       |
|                   | Total   |                   | 1002 | 100.0 |       |       |

**Progress2 - I was made to feel like I was wasting everyone's time.**

| Region     |         |                   | Frequency | Percent | Valid Percent | Cumulative Percent |
|------------|---------|-------------------|-----------|---------|---------------|--------------------|
| South      | Valid   | Strongly Disagree | 63        | 6.3     | 42.6          | 42.6               |
|            |         | Disagree          | 72        | 7.2     | 48.6          | 91.2               |
|            |         | Agree             | 10        | 1.0     | 6.8           | 98.0               |
|            |         | Strongly Agree    | 3         | .3      | 2.0           | 100.0              |
|            |         | Total             | 148       | 14.8    | 100.0         |                    |
|            | Missing | System            | 855       | 85.2    |               |                    |
| Total      |         |                   | 1003      | 100.0   |               |                    |
| Mid-West   | Valid   | Strongly Disagree | 54        | 5.4     | 35.1          | 35.1               |
|            |         | Disagree          | 83        | 8.4     | 53.9          | 89.0               |
|            |         | Neither           | 4         | .4      | 2.6           | 91.6               |
|            |         | Agree             | 10        | 1.0     | 6.5           | 98.1               |
|            |         | Strongly Agree    | 3         | .3      | 1.9           | 100.0              |
|            | Total   | 154               | 15.5      | 100.0   |               |                    |
| Missing    | System  | 838               | 84.5      |         |               |                    |
| Total      |         |                   | 992       | 100.0   |               |                    |
| South East | Valid   | Strongly Disagree | 47        | 4.7     | 33.8          | 33.8               |
|            |         | Disagree          | 82        | 8.2     | 59.0          | 92.8               |
|            |         | Neither           | 1         | .1      | .7            | 93.5               |
|            |         | Agree             | 6         | .6      | 4.3           | 97.8               |
|            |         | Strongly Agree    | 3         | .3      | 2.2           | 100.0              |
|            | Total   | 139               | 14.0      | 100.0   |               |                    |
| Missing    | System  | 857               | 86.0      |         |               |                    |
| Total      |         |                   | 996       | 100.0   |               |                    |
| North East | Valid   | Strongly Disagree | 68        | 6.8     | 41.2          | 41.2               |
|            |         | Disagree          | 76        | 7.7     | 46.1          | 87.3               |
|            |         | Neither           | 4         | .4      | 2.4           | 89.7               |
|            |         | Agree             | 13        | 1.3     | 7.9           | 97.6               |
|            |         | Strongly Agree    | 4         | .4      | 2.4           | 100.0              |
|            | Total   | 165               | 16.6      | 100.0   |               |                    |
| Missing    | System  | 828               | 83.4      |         |               |                    |
| Total      |         |                   | 993       | 100.0   |               |                    |
| West       | Valid   | Strongly Disagree | 44        | 4.4     | 34.6          | 34.6               |
|            |         | Disagree          | 71        | 7.1     | 55.9          | 90.6               |
|            |         | Neither           | 1         | .1      | .8            | 91.3               |
|            |         | Agree             | 9         | .9      | 7.1           | 98.4               |
|            |         | Strongly Agree    | 2         | .2      | 1.6           | 100.0              |
|            | Total   | 127               | 12.6      | 100.0   |               |                    |

|                   |         |                   |      |       |       |       |
|-------------------|---------|-------------------|------|-------|-------|-------|
|                   | Missing | System            | 880  | 87.4  |       |       |
|                   | Total   |                   | 1007 | 100.0 |       |       |
| Dublin North East | Valid   | Strongly Disagree | 57   | 5.7   | 39.3  | 39.3  |
|                   |         | Disagree          | 71   | 7.1   | 49.0  | 88.3  |
|                   |         | Neither           | 3    | .3    | 2.1   | 90.3  |
|                   |         | Agree             | 11   | 1.1   | 7.6   | 97.9  |
|                   |         | Strongly Agree    | 3    | .3    | 2.1   | 100.0 |
|                   | Total   |                   | 145  | 14.5  | 100.0 |       |
|                   | Missing | System            | 856  | 85.5  |       |       |
|                   | Total   |                   | 1001 | 100.0 |       |       |
| Dublin Midlands   | Valid   | Strongly Disagree | 66   | 6.5   | 42.6  | 42.6  |
|                   |         | Disagree          | 74   | 7.3   | 47.7  | 90.3  |
|                   |         | Neither           | 1    | .1    | .6    | 91.0  |
|                   |         | Agree             | 9    | .9    | 5.8   | 96.8  |
|                   |         | Strongly Agree    | 5    | .5    | 3.2   | 100.0 |
|                   | Total   |                   | 155  | 15.4  | 100.0 |       |
|                   | Missing | System            | 853  | 84.6  |       |       |
|                   | Total   |                   | 1008 | 100.0 |       |       |
| Dublin South      | Valid   | Strongly Disagree | 70   | 7.0   | 42.9  | 42.9  |
|                   |         | Disagree          | 84   | 8.4   | 51.5  | 94.5  |
|                   |         | Neither           | 1    | .1    | .6    | 95.1  |
|                   |         | Agree             | 4    | .4    | 2.5   | 97.5  |
|                   |         | Strongly Agree    | 4    | .4    | 2.5   | 100.0 |
|                   | Total   |                   | 163  | 16.3  | 100.0 |       |
|                   | Missing | System            | 839  | 83.7  |       |       |
|                   | Total   |                   | 1002 | 100.0 |       |       |

**Progress3 - I had to push to get the help I needed.**

| Region     |         |                   | Frequency | Percent | Valid Percent | Cumulative Percent |
|------------|---------|-------------------|-----------|---------|---------------|--------------------|
| South      | Valid   | Strongly Disagree | 52        | 5.2     | 35.1          | 35.1               |
|            |         | Disagree          | 68        | 6.8     | 45.9          | 81.1               |
|            |         | Neither           | 3         | .3      | 2.0           | 83.1               |
|            |         | Agree             | 20        | 2.0     | 13.5          | 96.6               |
|            |         | Strongly Agree    | 5         | .5      | 3.4           | 100.0              |
|            |         | Total             | 148       | 14.8    | 100.0         |                    |
|            | Missing | System            | 855       | 85.2    |               |                    |
| Total      |         |                   | 1003      | 100.0   |               |                    |
| Mid-West   | Valid   | Strongly Disagree | 43        | 4.3     | 28.1          | 28.1               |
|            |         | Disagree          | 73        | 7.4     | 47.7          | 75.8               |
|            |         | Neither           | 4         | .4      | 2.6           | 78.4               |
|            |         | Agree             | 23        | 2.3     | 15.0          | 93.5               |
|            |         | Strongly Agree    | 10        | 1.0     | 6.5           | 100.0              |
|            |         | Total             | 153       | 15.4    | 100.0         |                    |
|            | Missing | System            | 839       | 84.6    |               |                    |
| Total      |         |                   | 992       | 100.0   |               |                    |
| South East | Valid   | Strongly Disagree | 36        | 3.6     | 25.9          | 25.9               |
|            |         | Disagree          | 74        | 7.4     | 53.2          | 79.1               |
|            |         | Neither           | 3         | .3      | 2.2           | 81.3               |
|            |         | Agree             | 18        | 1.8     | 12.9          | 94.2               |
|            |         | Strongly Agree    | 8         | .8      | 5.8           | 100.0              |
|            |         | Total             | 139       | 14.0    | 100.0         |                    |
|            | Missing | System            | 857       | 86.0    |               |                    |
| Total      |         |                   | 996       | 100.0   |               |                    |
| North East | Valid   | Strongly Disagree | 55        | 5.5     | 33.1          | 33.1               |
|            |         | Disagree          | 84        | 8.5     | 50.6          | 83.7               |
|            |         | Agree             | 18        | 1.8     | 10.8          | 94.6               |
|            |         | Strongly Agree    | 9         | .9      | 5.4           | 100.0              |
|            |         | Total             | 166       | 16.7    | 100.0         |                    |
|            |         | Missing           | System    | 827     | 83.3          |                    |
|            | Total   |                   |           | 993     | 100.0         |                    |
| West       | Valid   | Strongly Disagree | 27        | 2.7     | 21.3          | 21.3               |
|            |         | Disagree          | 71        | 7.1     | 55.9          | 77.2               |
|            |         | Neither           | 1         | .1      | .8            | 78.0               |
|            |         | Agree             | 16        | 1.6     | 12.6          | 90.6               |
|            |         | Strongly Agree    | 12        | 1.2     | 9.4           | 100.0              |
|            |         | Total             | 127       | 12.6    | 100.0         |                    |

|                   |         |                   |      |       |       |       |
|-------------------|---------|-------------------|------|-------|-------|-------|
|                   | Missing | System            | 880  | 87.4  |       |       |
|                   | Total   |                   | 1007 | 100.0 |       |       |
| Dublin North East | Valid   | Strongly Disagree | 46   | 4.6   | 31.1  | 31.1  |
|                   |         | Disagree          | 68   | 6.8   | 45.9  | 77.0  |
|                   |         | Neither           | 5    | .5    | 3.4   | 80.4  |
|                   |         | Agree             | 19   | 1.9   | 12.8  | 93.2  |
|                   |         | Strongly Agree    | 10   | 1.0   | 6.8   | 100.0 |
|                   |         | Total             | 148  | 14.8  | 100.0 |       |
|                   | Missing | System            | 853  | 85.2  |       |       |
|                   | Total   |                   | 1001 | 100.0 |       |       |
| Dublin Midlands   | Valid   | Strongly Disagree | 53   | 5.3   | 34.4  | 34.4  |
|                   |         | Disagree          | 71   | 7.0   | 46.1  | 80.5  |
|                   |         | Neither           | 3    | .3    | 1.9   | 82.5  |
|                   |         | Agree             | 18   | 1.8   | 11.7  | 94.2  |
|                   |         | Strongly Agree    | 9    | .9    | 5.8   | 100.0 |
|                   |         | Total             | 154  | 15.3  | 100.0 |       |
|                   | Missing | System            | 854  | 84.7  |       |       |
|                   | Total   |                   | 1008 | 100.0 |       |       |
| Dublin South      | Valid   | Strongly Disagree | 46   | 4.6   | 28.0  | 28.0  |
|                   |         | Disagree          | 82   | 8.2   | 50.0  | 78.0  |
|                   |         | Neither           | 3    | .3    | 1.8   | 79.9  |
|                   |         | Agree             | 18   | 1.8   | 11.0  | 90.9  |
|                   |         | Strongly Agree    | 15   | 1.5   | 9.1   | 100.0 |
|                   |         | Total             | 164  | 16.4  | 100.0 |       |
|                   | Missing | System            | 838  | 83.6  |       |       |
|                   | Total   |                   | 1002 | 100.0 |       |       |

**Progress4 - I moved through the system smoothly.**

| Region     |         |                   | Frequency | Percent | Valid Percent | Cumulative Percent |
|------------|---------|-------------------|-----------|---------|---------------|--------------------|
| South      | Valid   | Strongly Disagree | 5         | .5      | 3.4           | 3.4                |
|            |         | Disagree          | 14        | 1.4     | 9.5           | 12.8               |
|            |         | Neither           | 7         | .7      | 4.7           | 17.6               |
|            |         | Agree             | 77        | 7.7     | 52.0          | 69.6               |
|            |         | Strongly Agree    | 45        | 4.5     | 30.4          | 100.0              |
|            |         | Total             | 148       | 14.8    | 100.0         |                    |
|            | Missing | System            | 855       | 85.2    |               |                    |
| Total      |         |                   | 1003      | 100.0   |               |                    |
| Mid-West   | Valid   | Strongly Disagree | 7         | .7      | 4.6           | 4.6                |
|            |         | Disagree          | 23        | 2.3     | 15.1          | 19.7               |
|            |         | Neither           | 4         | .4      | 2.6           | 22.4               |
|            |         | Agree             | 76        | 7.7     | 50.0          | 72.4               |
|            |         | Strongly Agree    | 42        | 4.2     | 27.6          | 100.0              |
|            |         | Total             | 152       | 15.3    | 100.0         |                    |
|            | Missing | System            | 840       | 84.7    |               |                    |
| Total      |         |                   | 992       | 100.0   |               |                    |
| South East | Valid   | Strongly Disagree | 4         | .4      | 2.9           | 2.9                |
|            |         | Disagree          | 9         | .9      | 6.6           | 9.5                |
|            |         | Neither           | 5         | .5      | 3.6           | 13.1               |
|            |         | Agree             | 83        | 8.3     | 60.6          | 73.7               |
|            |         | Strongly Agree    | 36        | 3.6     | 26.3          | 100.0              |
|            |         | Total             | 137       | 13.8    | 100.0         |                    |
|            | Missing | System            | 859       | 86.2    |               |                    |
| Total      |         |                   | 996       | 100.0   |               |                    |
| North East | Valid   | Strongly Disagree | 7         | .7      | 4.2           | 4.2                |
|            |         | Disagree          | 15        | 1.5     | 9.0           | 13.3               |
|            |         | Neither           | 7         | .7      | 4.2           | 17.5               |
|            |         | Agree             | 92        | 9.3     | 55.4          | 72.9               |
|            |         | Strongly Agree    | 45        | 4.5     | 27.1          | 100.0              |
|            |         | Total             | 166       | 16.7    | 100.0         |                    |
|            | Missing | System            | 827       | 83.3    |               |                    |
| Total      |         |                   | 993       | 100.0   |               |                    |
| West       | Valid   | Strongly Disagree | 8         | .8      | 6.3           | 6.3                |
|            |         | Disagree          | 10        | 1.0     | 7.9           | 14.2               |
|            |         | Neither           | 7         | .7      | 5.5           | 19.7               |
|            |         | Agree             | 77        | 7.6     | 60.6          | 80.3               |
|            |         | Strongly Agree    | 25        | 2.5     | 19.7          | 100.0              |



|                   |         |                   |      |       |       |       |
|-------------------|---------|-------------------|------|-------|-------|-------|
|                   |         | Total             | 127  | 12.6  | 100.0 |       |
|                   | Missing | System            | 880  | 87.4  |       |       |
|                   |         | Total             | 1007 | 100.0 |       |       |
| Dublin North East | Valid   | Strongly Disagree | 6    | .6    | 4.1   | 4.1   |
|                   |         | Disagree          | 16   | 1.6   | 11.0  | 15.2  |
|                   |         | Neither           | 4    | .4    | 2.8   | 17.9  |
|                   |         | Agree             | 81   | 8.1   | 55.9  | 73.8  |
|                   |         | Strongly Agree    | 38   | 3.8   | 26.2  | 100.0 |
|                   |         | Total             | 145  | 14.5  | 100.0 |       |
|                   | Missing | System            | 856  | 85.5  |       |       |
|                   |         | Total             | 1001 | 100.0 |       |       |
| Dublin Midlands   | Valid   | Strongly Disagree | 7    | .7    | 4.6   | 4.6   |
|                   |         | Disagree          | 18   | 1.8   | 11.8  | 16.3  |
|                   |         | Neither           | 3    | .3    | 2.0   | 18.3  |
|                   |         | Agree             | 80   | 7.9   | 52.3  | 70.6  |
|                   |         | Strongly Agree    | 45   | 4.5   | 29.4  | 100.0 |
|                   |         | Total             | 153  | 15.2  | 100.0 |       |
|                   | Missing | System            | 855  | 84.8  |       |       |
|                   |         | Total             | 1008 | 100.0 |       |       |
| Dublin South      | Valid   | Strongly Disagree | 5    | .5    | 3.1   | 3.1   |
|                   |         | Disagree          | 13   | 1.3   | 8.0   | 11.1  |
|                   |         | Neither           | 5    | .5    | 3.1   | 14.2  |
|                   |         | Agree             | 93   | 9.3   | 57.4  | 71.6  |
|                   |         | Strongly Agree    | 46   | 4.6   | 28.4  | 100.0 |
|                   |         | Total             | 162  | 16.2  | 100.0 |       |
|                   | Missing | System            | 840  | 83.8  |       |       |
|                   |         | Total             | 1002 | 100.0 |       |       |

**Progress5 - It took too long to get the care needed.**

| Region     |         |                   | Frequency | Percent | Valid Percent | Cumulative Percent |
|------------|---------|-------------------|-----------|---------|---------------|--------------------|
| South      | Valid   | Strongly Disagree | 40        | 4.0     | 27.0          | 27.0               |
|            |         | Disagree          | 76        | 7.6     | 51.4          | 78.4               |
|            |         | Neither           | 5         | .5      | 3.4           | 81.8               |
|            |         | Agree             | 20        | 2.0     | 13.5          | 95.3               |
|            |         | Strongly Agree    | 7         | .7      | 4.7           | 100.0              |
|            |         | Total             | 148       | 14.8    | 100.0         |                    |
|            | Missing | System            | 855       | 85.2    |               |                    |
| Total      |         |                   | 1003      | 100.0   |               |                    |
| Mid-West   | Valid   | Strongly Disagree | 37        | 3.7     | 24.2          | 24.2               |
|            |         | Disagree          | 78        | 7.9     | 51.0          | 75.2               |
|            |         | Neither           | 4         | .4      | 2.6           | 77.8               |
|            |         | Agree             | 21        | 2.1     | 13.7          | 91.5               |
|            |         | Strongly Agree    | 13        | 1.3     | 8.5           | 100.0              |
|            |         | Total             | 153       | 15.4    | 100.0         |                    |
|            | Missing | System            | 839       | 84.6    |               |                    |
| Total      |         |                   | 992       | 100.0   |               |                    |
| South East | Valid   | Strongly Disagree | 33        | 3.3     | 23.7          | 23.7               |
|            |         | Disagree          | 71        | 7.1     | 51.1          | 74.8               |
|            |         | Neither           | 5         | .5      | 3.6           | 78.4               |
|            |         | Agree             | 20        | 2.0     | 14.4          | 92.8               |
|            |         | Strongly Agree    | 10        | 1.0     | 7.2           | 100.0              |
|            |         | Total             | 139       | 14.0    | 100.0         |                    |
|            | Missing | System            | 857       | 86.0    |               |                    |
| Total      |         |                   | 996       | 100.0   |               |                    |
| North East | Valid   | Strongly Disagree | 52        | 5.2     | 31.5          | 31.5               |
|            |         | Disagree          | 79        | 8.0     | 47.9          | 79.4               |
|            |         | Neither           | 8         | .8      | 4.8           | 84.2               |
|            |         | Agree             | 18        | 1.8     | 10.9          | 95.2               |
|            |         | Strongly Agree    | 8         | .8      | 4.8           | 100.0              |
|            |         | Total             | 165       | 16.6    | 100.0         |                    |
|            | Missing | System            | 828       | 83.4    |               |                    |
| Total      |         |                   | 993       | 100.0   |               |                    |
| West       | Valid   | Strongly Disagree | 26        | 2.6     | 20.5          | 20.5               |
|            |         | Disagree          | 70        | 7.0     | 55.1          | 75.6               |
|            |         | Neither           | 3         | .3      | 2.4           | 78.0               |
|            |         | Agree             | 15        | 1.5     | 11.8          | 89.8               |
|            |         | Strongly Agree    | 13        | 1.3     | 10.2          | 100.0              |

|                   |         |                   |      |       |       |       |
|-------------------|---------|-------------------|------|-------|-------|-------|
|                   |         | Total             | 127  | 12.6  | 100.0 |       |
|                   | Missing | System            | 880  | 87.4  |       |       |
|                   |         | Total             | 1007 | 100.0 |       |       |
| Dublin North East | Valid   | Strongly Disagree | 41   | 4.1   | 27.9  | 27.9  |
|                   |         | Disagree          | 66   | 6.6   | 44.9  | 72.8  |
|                   |         | Neither           | 6    | .6    | 4.1   | 76.9  |
|                   |         | Agree             | 20   | 2.0   | 13.6  | 90.5  |
|                   |         | Strongly Agree    | 14   | 1.4   | 9.5   | 100.0 |
|                   |         | Total             | 147  | 14.7  | 100.0 |       |
|                   | Missing | System            | 854  | 85.3  |       |       |
|                   |         | Total             | 1001 | 100.0 |       |       |
| Dublin Midlands   | Valid   | Strongly Disagree | 40   | 4.0   | 26.0  | 26.0  |
|                   |         | Disagree          | 78   | 7.7   | 50.6  | 76.6  |
|                   |         | Neither           | 4    | .4    | 2.6   | 79.2  |
|                   |         | Agree             | 21   | 2.1   | 13.6  | 92.9  |
|                   |         | Strongly Agree    | 11   | 1.1   | 7.1   | 100.0 |
|                   |         | Total             | 154  | 15.3  | 100.0 |       |
|                   | Missing | System            | 854  | 84.7  |       |       |
|                   |         | Total             | 1008 | 100.0 |       |       |
| Dublin South      | Valid   | Strongly Disagree | 48   | 4.8   | 29.4  | 29.4  |
|                   |         | Disagree          | 77   | 7.7   | 47.2  | 76.7  |
|                   |         | Neither           | 7    | .7    | 4.3   | 81.0  |
|                   |         | Agree             | 20   | 2.0   | 12.3  | 93.3  |
|                   |         | Strongly Agree    | 11   | 1.1   | 6.7   | 100.0 |
|                   |         | Total             | 163  | 16.3  | 100.0 |       |
|                   | Missing | System            | 839  | 83.7  |       |       |
|                   |         | Total             | 1002 | 100.0 |       |       |

**Progress6 - I felt that no one took responsibility and sorted out my problem.**

| Region     |         |                   | Frequency | Percent | Valid Percent | Cumulative Percent |
|------------|---------|-------------------|-----------|---------|---------------|--------------------|
| South      | Valid   | Strongly Disagree | 54        | 5.4     | 36.5          | 36.5               |
|            |         | Disagree          | 77        | 7.7     | 52.0          | 88.5               |
|            |         | Neither           | 3         | .3      | 2.0           | 90.5               |
|            |         | Agree             | 10        | 1.0     | 6.8           | 97.3               |
|            |         | Strongly Agree    | 4         | .4      | 2.7           | 100.0              |
|            |         | Total             | 148       | 14.8    | 100.0         |                    |
|            | Missing | System            | 855       | 85.2    |               |                    |
| Total      |         |                   | 1003      | 100.0   |               |                    |
| Mid-West   | Valid   | Strongly Disagree | 41        | 4.1     | 26.6          | 26.6               |
|            |         | Disagree          | 94        | 9.5     | 61.0          | 87.7               |
|            |         | Neither           | 3         | .3      | 1.9           | 89.6               |
|            |         | Agree             | 13        | 1.3     | 8.4           | 98.1               |
|            |         | Strongly Agree    | 3         | .3      | 1.9           | 100.0              |
|            |         | Total             | 154       | 15.5    | 100.0         |                    |
|            | Missing | System            | 838       | 84.5    |               |                    |
| Total      |         |                   | 992       | 100.0   |               |                    |
| South East | Valid   | Strongly Disagree | 35        | 3.5     | 25.2          | 25.2               |
|            |         | Disagree          | 91        | 9.1     | 65.5          | 90.6               |
|            |         | Neither           | 1         | .1      | .7            | 91.4               |
|            |         | Agree             | 9         | .9      | 6.5           | 97.8               |
|            |         | Strongly Agree    | 3         | .3      | 2.2           | 100.0              |
|            |         | Total             | 139       | 14.0    | 100.0         |                    |
|            | Missing | System            | 857       | 86.0    |               |                    |
| Total      |         |                   | 996       | 100.0   |               |                    |
| North East | Valid   | Strongly Disagree | 54        | 5.4     | 32.5          | 32.5               |
|            |         | Disagree          | 88        | 8.9     | 53.0          | 85.5               |
|            |         | Neither           | 6         | .6      | 3.6           | 89.2               |
|            |         | Agree             | 16        | 1.6     | 9.6           | 98.8               |
|            |         | Strongly Agree    | 2         | .2      | 1.2           | 100.0              |
|            |         | Total             | 166       | 16.7    | 100.0         |                    |
|            | Missing | System            | 827       | 83.3    |               |                    |
| Total      |         |                   | 993       | 100.0   |               |                    |
| West       | Valid   | Strongly Disagree | 33        | 3.3     | 26.0          | 26.0               |
|            |         | Disagree          | 77        | 7.6     | 60.6          | 86.6               |
|            |         | Neither           | 1         | .1      | .8            | 87.4               |
|            |         | Agree             | 10        | 1.0     | 7.9           | 95.3               |
|            |         | Strongly Agree    | 6         | .6      | 4.7           | 100.0              |

|                   |         |                   |      |       |       |       |
|-------------------|---------|-------------------|------|-------|-------|-------|
|                   |         | Total             | 127  | 12.6  | 100.0 |       |
|                   | Missing | System            | 880  | 87.4  |       |       |
|                   |         | Total             | 1007 | 100.0 |       |       |
| Dublin North East | Valid   | Strongly Disagree | 39   | 3.9   | 26.5  | 26.5  |
|                   |         | Disagree          | 84   | 8.4   | 57.1  | 83.7  |
|                   |         | Neither           | 8    | .8    | 5.4   | 89.1  |
|                   |         | Agree             | 14   | 1.4   | 9.5   | 98.6  |
|                   |         | Strongly Agree    | 2    | .2    | 1.4   | 100.0 |
|                   |         | Total             | 147  | 14.7  | 100.0 |       |
|                   | Missing | System            | 854  | 85.3  |       |       |
|                   |         | Total             | 1001 | 100.0 |       |       |
| Dublin Midlands   | Valid   | Strongly Disagree | 54   | 5.4   | 35.1  | 35.1  |
|                   |         | Disagree          | 77   | 7.6   | 50.0  | 85.1  |
|                   |         | Neither           | 1    | .1    | .6    | 85.7  |
|                   |         | Agree             | 12   | 1.2   | 7.8   | 93.5  |
|                   |         | Strongly Agree    | 10   | 1.0   | 6.5   | 100.0 |
|                   |         | Total             | 154  | 15.3  | 100.0 |       |
|                   | Missing | System            | 854  | 84.7  |       |       |
|                   |         | Total             | 1008 | 100.0 |       |       |
| Dublin South      | Valid   | Strongly Disagree | 54   | 5.4   | 33.3  | 33.3  |
|                   |         | Disagree          | 89   | 8.9   | 54.9  | 88.3  |
|                   |         | Neither           | 4    | .4    | 2.5   | 90.7  |
|                   |         | Agree             | 8    | .8    | 4.9   | 95.7  |
|                   |         | Strongly Agree    | 7    | .7    | 4.3   | 100.0 |
|                   |         | Total             | 162  | 16.2  | 100.0 |       |
|                   | Missing | System            | 840  | 83.8  |       |       |
|                   |         | Total             | 1002 | 100.0 |       |       |

**Progress7 - I saw the right people.**

| Region     |         |                   | Frequency | Percent | Valid Percent | Cumulative Percent |
|------------|---------|-------------------|-----------|---------|---------------|--------------------|
| South      | Valid   | Strongly Disagree | 3         | .3      | 2.0           | 2.0                |
|            |         | Disagree          | 6         | .6      | 4.1           | 6.1                |
|            |         | Neither           | 1         | .1      | .7            | 6.8                |
|            |         | Agree             | 85        | 8.5     | 57.8          | 64.6               |
|            |         | Strongly Agree    | 52        | 5.2     | 35.4          | 100.0              |
|            |         | Total             | 147       | 14.7    | 100.0         |                    |
|            | Missing | System            | 856       | 85.3    |               |                    |
| Total      |         |                   | 1003      | 100.0   |               |                    |
| Mid-West   | Valid   | Strongly Disagree | 2         | .2      | 1.3           | 1.3                |
|            |         | Disagree          | 4         | .4      | 2.6           | 3.9                |
|            |         | Neither           | 2         | .2      | 1.3           | 5.2                |
|            |         | Agree             | 103       | 10.4    | 66.5          | 71.6               |
|            |         | Strongly Agree    | 44        | 4.4     | 28.4          | 100.0              |
|            |         | Total             | 155       | 15.6    | 100.0         |                    |
|            | Missing | System            | 837       | 84.4    |               |                    |
| Total      |         |                   | 992       | 100.0   |               |                    |
| South East | Valid   | Strongly Disagree | 1         | .1      | .7            | .7                 |
|            |         | Disagree          | 5         | .5      | 3.6           | 4.3                |
|            |         | Neither           | 1         | .1      | .7            | 5.1                |
|            |         | Agree             | 88        | 8.8     | 63.8          | 68.8               |
|            |         | Strongly Agree    | 43        | 4.3     | 31.2          | 100.0              |
|            |         | Total             | 138       | 13.9    | 100.0         |                    |
|            | Missing | System            | 858       | 86.1    |               |                    |
| Total      |         |                   | 996       | 100.0   |               |                    |
| North East | Valid   | Strongly Disagree | 1         | .1      | .6            | .6                 |
|            |         | Disagree          | 8         | .8      | 4.8           | 5.5                |
|            |         | Neither           | 4         | .4      | 2.4           | 7.9                |
|            |         | Agree             | 95        | 9.6     | 57.6          | 65.5               |
|            |         | Strongly Agree    | 57        | 5.7     | 34.5          | 100.0              |
|            |         | Total             | 165       | 16.6    | 100.0         |                    |
|            | Missing | System            | 828       | 83.4    |               |                    |
| Total      |         |                   | 993       | 100.0   |               |                    |
| West       | Valid   | Strongly Disagree | 2         | .2      | 1.6           | 1.6                |
|            |         | Disagree          | 5         | .5      | 4.0           | 5.6                |
|            |         | Neither           | 3         | .3      | 2.4           | 7.9                |
|            |         | Agree             | 87        | 8.6     | 69.0          | 77.0               |
|            |         | Strongly Agree    | 29        | 2.9     | 23.0          | 100.0              |

|                   |         |                   |      |       |       |       |
|-------------------|---------|-------------------|------|-------|-------|-------|
|                   |         | Total             | 126  | 12.5  | 100.0 |       |
|                   | Missing | System            | 881  | 87.5  |       |       |
|                   |         | Total             | 1007 | 100.0 |       |       |
| Dublin North East | Valid   | Strongly Disagree | 2    | .2    | 1.4   | 1.4   |
|                   |         | Disagree          | 8    | .8    | 5.4   | 6.8   |
|                   |         | Neither           | 3    | .3    | 2.0   | 8.8   |
|                   |         | Agree             | 94   | 9.4   | 63.9  | 72.8  |
|                   |         | Strongly Agree    | 40   | 4.0   | 27.2  | 100.0 |
|                   |         | Total             | 147  | 14.7  | 100.0 |       |
|                   | Missing | System            | 854  | 85.3  |       |       |
|                   |         | Total             | 1001 | 100.0 |       |       |
| Dublin Midlands   | Valid   | Strongly Disagree | 3    | .3    | 1.9   | 1.9   |
|                   |         | Disagree          | 11   | 1.1   | 7.1   | 9.0   |
|                   |         | Neither           | 1    | .1    | .6    | 9.6   |
|                   |         | Agree             | 95   | 9.4   | 60.9  | 70.5  |
|                   |         | Strongly Agree    | 46   | 4.6   | 29.5  | 100.0 |
|                   |         | Total             | 156  | 15.5  | 100.0 |       |
|                   | Missing | System            | 852  | 84.5  |       |       |
|                   |         | Total             | 1008 | 100.0 |       |       |
| Dublin South      | Valid   | Strongly Disagree | 1    | .1    | .6    | .6    |
|                   |         | Disagree          | 10   | 1.0   | 6.2   | 6.8   |
|                   |         | Neither           | 3    | .3    | 1.9   | 8.7   |
|                   |         | Agree             | 100  | 10.0  | 62.1  | 70.8  |
|                   |         | Strongly Agree    | 47   | 4.7   | 29.2  | 100.0 |
|                   |         | Total             | 161  | 16.1  | 100.0 |       |
|                   | Missing | System            | 841  | 83.9  |       |       |
|                   |         | Total             | 1002 | 100.0 |       |       |

**Progress8 - I felt I was given the wrong advice.**

| Region     |         |                   | Frequency | Percent | Valid Percent | Cumulative Percent |
|------------|---------|-------------------|-----------|---------|---------------|--------------------|
| South      | Valid   | Strongly Disagree | 55        | 5.5     | 37.4          | 37.4               |
|            |         | Disagree          | 78        | 7.8     | 53.1          | 90.5               |
|            |         | Neither           | 5         | .5      | 3.4           | 93.9               |
|            |         | Agree             | 9         | .9      | 6.1           | 100.0              |
|            |         | Total             | 147       | 14.7    | 100.0         |                    |
|            | Missing | System            | 856       | 85.3    |               |                    |
| Total      |         |                   | 1003      | 100.0   |               |                    |
| Mid-West   | Valid   | Strongly Disagree | 36        | 3.6     | 23.2          | 23.2               |
|            |         | Disagree          | 104       | 10.5    | 67.1          | 90.3               |
|            |         | Neither           | 3         | .3      | 1.9           | 92.3               |
|            |         | Agree             | 9         | .9      | 5.8           | 98.1               |
|            |         | Strongly Agree    | 3         | .3      | 1.9           | 100.0              |
|            | Total   | 155               | 15.6      | 100.0   |               |                    |
| Missing    | System  | 837               | 84.4      |         |               |                    |
| Total      |         |                   | 992       | 100.0   |               |                    |
| South East | Valid   | Strongly Disagree | 43        | 4.3     | 30.9          | 30.9               |
|            |         | Disagree          | 85        | 8.5     | 61.2          | 92.1               |
|            |         | Neither           | 3         | .3      | 2.2           | 94.2               |
|            |         | Agree             | 5         | .5      | 3.6           | 97.8               |
|            |         | Strongly Agree    | 3         | .3      | 2.2           | 100.0              |
|            | Total   | 139               | 14.0      | 100.0   |               |                    |
| Missing    | System  | 857               | 86.0      |         |               |                    |
| Total      |         |                   | 996       | 100.0   |               |                    |
| North East | Valid   | Strongly Disagree | 65        | 6.5     | 39.6          | 39.6               |
|            |         | Disagree          | 81        | 8.2     | 49.4          | 89.0               |
|            |         | Neither           | 4         | .4      | 2.4           | 91.5               |
|            |         | Agree             | 12        | 1.2     | 7.3           | 98.8               |
|            |         | Strongly Agree    | 2         | .2      | 1.2           | 100.0              |
|            | Total   | 164               | 16.5      | 100.0   |               |                    |
| Missing    | System  | 829               | 83.5      |         |               |                    |
| Total      |         |                   | 993       | 100.0   |               |                    |
| West       | Valid   | Strongly Disagree | 33        | 3.3     | 26.0          | 26.0               |
|            |         | Disagree          | 81        | 8.0     | 63.8          | 89.8               |
|            |         | Neither           | 5         | .5      | 3.9           | 93.7               |
|            |         | Agree             | 5         | .5      | 3.9           | 97.6               |
|            |         | Strongly Agree    | 3         | .3      | 2.4           | 100.0              |
|            | Total   | 127               | 12.6      | 100.0   |               |                    |



|                   |         |                   |      |       |       |       |
|-------------------|---------|-------------------|------|-------|-------|-------|
|                   | Missing | System            | 880  | 87.4  |       |       |
|                   | Total   |                   | 1007 | 100.0 |       |       |
| Dublin North East | Valid   | Strongly Disagree | 40   | 4.0   | 27.4  | 27.4  |
|                   |         | Disagree          | 86   | 8.6   | 58.9  | 86.3  |
|                   |         | Neither           | 3    | .3    | 2.1   | 88.4  |
|                   |         | Agree             | 11   | 1.1   | 7.5   | 95.9  |
|                   |         | Strongly Agree    | 6    | .6    | 4.1   | 100.0 |
|                   | Total   |                   | 146  | 14.6  | 100.0 |       |
|                   | Missing | System            | 855  | 85.4  |       |       |
|                   | Total   |                   | 1001 | 100.0 |       |       |
| Dublin Midlands   | Valid   | Strongly Disagree | 55   | 5.5   | 35.7  | 35.7  |
|                   |         | Disagree          | 77   | 7.6   | 50.0  | 85.7  |
|                   |         | Neither           | 4    | .4    | 2.6   | 88.3  |
|                   |         | Agree             | 14   | 1.4   | 9.1   | 97.4  |
|                   |         | Strongly Agree    | 4    | .4    | 2.6   | 100.0 |
|                   | Total   |                   | 154  | 15.3  | 100.0 |       |
|                   | Missing | System            | 854  | 84.7  |       |       |
|                   | Total   |                   | 1008 | 100.0 |       |       |
| Dublin South      | Valid   | Strongly Disagree | 58   | 5.8   | 35.8  | 35.8  |
|                   |         | Disagree          | 86   | 8.6   | 53.1  | 88.9  |
|                   |         | Neither           | 3    | .3    | 1.9   | 90.7  |
|                   |         | Agree             | 13   | 1.3   | 8.0   | 98.8  |
|                   |         | Strongly Agree    | 2    | .2    | 1.2   | 100.0 |
|                   | Total   |                   | 162  | 16.2  | 100.0 |       |
|                   | Missing | System            | 840  | 83.8  |       |       |
|                   | Total   |                   | 1002 | 100.0 |       |       |

**Progress9 - Services did not seem to talk to each other.**

| Region     |         |                   | Frequency | Percent | Valid Percent | Cumulative Percent |
|------------|---------|-------------------|-----------|---------|---------------|--------------------|
| South      | Valid   | Strongly Disagree | 30        | 3.0     | 22.6          | 22.6               |
|            |         | Disagree          | 65        | 6.5     | 48.9          | 71.4               |
|            |         | Neither           | 7         | .7      | 5.3           | 76.7               |
|            |         | Agree             | 23        | 2.3     | 17.3          | 94.0               |
|            |         | Strongly Agree    | 8         | .8      | 6.0           | 100.0              |
|            |         | Total             | 133       | 13.3    | 100.0         |                    |
|            | Missing | System            | 870       | 86.7    |               |                    |
| Total      |         |                   | 1003      | 100.0   |               |                    |
| Mid-West   | Valid   | Strongly Disagree | 24        | 2.4     | 17.3          | 17.3               |
|            |         | Disagree          | 67        | 6.8     | 48.2          | 65.5               |
|            |         | Neither           | 4         | .4      | 2.9           | 68.3               |
|            |         | Agree             | 31        | 3.1     | 22.3          | 90.6               |
|            |         | Strongly Agree    | 13        | 1.3     | 9.4           | 100.0              |
|            |         | Total             | 139       | 14.0    | 100.0         |                    |
|            | Missing | System            | 853       | 86.0    |               |                    |
| Total      |         |                   | 992       | 100.0   |               |                    |
| South East | Valid   | Strongly Disagree | 26        | 2.6     | 20.3          | 20.3               |
|            |         | Disagree          | 72        | 7.2     | 56.3          | 76.6               |
|            |         | Neither           | 2         | .2      | 1.6           | 78.1               |
|            |         | Agree             | 21        | 2.1     | 16.4          | 94.5               |
|            |         | Strongly Agree    | 7         | .7      | 5.5           | 100.0              |
|            |         | Total             | 128       | 12.9    | 100.0         |                    |
|            | Missing | System            | 868       | 87.1    |               |                    |
| Total      |         |                   | 996       | 100.0   |               |                    |
| North East | Valid   | Strongly Disagree | 30        | 3.0     | 21.4          | 21.4               |
|            |         | Disagree          | 64        | 6.4     | 45.7          | 67.1               |
|            |         | Neither           | 9         | .9      | 6.4           | 73.6               |
|            |         | Agree             | 28        | 2.8     | 20.0          | 93.6               |
|            |         | Strongly Agree    | 9         | .9      | 6.4           | 100.0              |
|            |         | Total             | 140       | 14.1    | 100.0         |                    |
|            | Missing | System            | 853       | 85.9    |               |                    |
| Total      |         |                   | 993       | 100.0   |               |                    |
| West       | Valid   | Strongly Disagree | 23        | 2.3     | 19.5          | 19.5               |
|            |         | Disagree          | 54        | 5.4     | 45.8          | 65.3               |
|            |         | Neither           | 7         | .7      | 5.9           | 71.2               |
|            |         | Agree             | 24        | 2.4     | 20.3          | 91.5               |
|            |         | Strongly Agree    | 10        | 1.0     | 8.5           | 100.0              |

|                   |         |                   |      |       |       |       |
|-------------------|---------|-------------------|------|-------|-------|-------|
|                   |         | Total             | 118  | 11.7  | 100.0 |       |
|                   | Missing | System            | 889  | 88.3  |       |       |
|                   |         | Total             | 1007 | 100.0 |       |       |
| Dublin North East | Valid   | Strongly Disagree | 23   | 2.3   | 18.7  | 18.7  |
|                   |         | Disagree          | 62   | 6.2   | 50.4  | 69.1  |
|                   |         | Neither           | 9    | .9    | 7.3   | 76.4  |
|                   |         | Agree             | 21   | 2.1   | 17.1  | 93.5  |
|                   |         | Strongly Agree    | 8    | .8    | 6.5   | 100.0 |
|                   |         | Total             | 123  | 12.3  | 100.0 |       |
|                   | Missing | System            | 878  | 87.7  |       |       |
|                   |         | Total             | 1001 | 100.0 |       |       |
| Dublin Midlands   | Valid   | Strongly Disagree | 30   | 3.0   | 22.6  | 22.6  |
|                   |         | Disagree          | 62   | 6.2   | 46.6  | 69.2  |
|                   |         | Neither           | 4    | .4    | 3.0   | 72.2  |
|                   |         | Agree             | 25   | 2.5   | 18.8  | 91.0  |
|                   |         | Strongly Agree    | 12   | 1.2   | 9.0   | 100.0 |
|                   |         | Total             | 133  | 13.2  | 100.0 |       |
|                   | Missing | System            | 875  | 86.8  |       |       |
|                   |         | Total             | 1008 | 100.0 |       |       |
| Dublin South      | Valid   | Strongly Disagree | 27   | 2.7   | 18.5  | 18.5  |
|                   |         | Disagree          | 65   | 6.5   | 44.5  | 63.0  |
|                   |         | Neither           | 8    | .8    | 5.5   | 68.5  |
|                   |         | Agree             | 34   | 3.4   | 23.3  | 91.8  |
|                   |         | Strongly Agree    | 12   | 1.2   | 8.2   | 100.0 |
|                   |         | Total             | 146  | 14.6  | 100.0 |       |
|                   | Missing | System            | 856  | 85.4  |       |       |
|                   |         | Total             | 1002 | 100.0 |       |       |

**Progress10 - At each stage I was confident in the advice services gave me.**

| Region     |         |                   | Frequency | Percent | Valid Percent | Cumulative Percent |
|------------|---------|-------------------|-----------|---------|---------------|--------------------|
| South      | Valid   | Strongly Disagree | 3         | .3      | 2.0           | 2.0                |
|            |         | Disagree          | 10        | 1.0     | 6.8           | 8.8                |
|            |         | Neither           | 5         | .5      | 3.4           | 12.2               |
|            |         | Agree             | 85        | 8.5     | 57.8          | 70.1               |
|            |         | Strongly Agree    | 44        | 4.4     | 29.9          | 100.0              |
|            |         | Total             | 147       | 14.7    | 100.0         |                    |
|            | Missing | System            | 856       | 85.3    |               |                    |
| Total      |         |                   | 1003      | 100.0   |               |                    |
| Mid-West   | Valid   | Strongly Disagree | 4         | .4      | 2.6           | 2.6                |
|            |         | Disagree          | 15        | 1.5     | 9.8           | 12.4               |
|            |         | Neither           | 7         | .7      | 4.6           | 17.0               |
|            |         | Agree             | 89        | 9.0     | 58.2          | 75.2               |
|            |         | Strongly Agree    | 38        | 3.8     | 24.8          | 100.0              |
|            |         | Total             | 153       | 15.4    | 100.0         |                    |
|            | Missing | System            | 839       | 84.6    |               |                    |
| Total      |         |                   | 992       | 100.0   |               |                    |
| South East | Valid   | Strongly Disagree | 2         | .2      | 1.4           | 1.4                |
|            |         | Disagree          | 12        | 1.2     | 8.6           | 10.1               |
|            |         | Neither           | 6         | .6      | 4.3           | 14.4               |
|            |         | Agree             | 82        | 8.2     | 59.0          | 73.4               |
|            |         | Strongly Agree    | 37        | 3.7     | 26.6          | 100.0              |
|            |         | Total             | 139       | 14.0    | 100.0         |                    |
|            | Missing | System            | 857       | 86.0    |               |                    |
| Total      |         |                   | 996       | 100.0   |               |                    |
| North East | Valid   | Strongly Disagree | 4         | .4      | 2.5           | 2.5                |
|            |         | Disagree          | 11        | 1.1     | 6.8           | 9.3                |
|            |         | Neither           | 2         | .2      | 1.2           | 10.5               |
|            |         | Agree             | 97        | 9.8     | 59.9          | 70.4               |
|            |         | Strongly Agree    | 48        | 4.8     | 29.6          | 100.0              |
|            |         | Total             | 162       | 16.3    | 100.0         |                    |
|            | Missing | System            | 831       | 83.7    |               |                    |
| Total      |         |                   | 993       | 100.0   |               |                    |
| West       | Valid   | Strongly Disagree | 4         | .4      | 3.1           | 3.1                |
|            |         | Disagree          | 9         | .9      | 7.1           | 10.2               |
|            |         | Neither           | 3         | .3      | 2.4           | 12.6               |
|            |         | Agree             | 84        | 8.3     | 66.1          | 78.7               |
|            |         | Strongly Agree    | 27        | 2.7     | 21.3          | 100.0              |

|                   |         |                   |      |       |       |       |
|-------------------|---------|-------------------|------|-------|-------|-------|
|                   |         | Total             | 127  | 12.6  | 100.0 |       |
|                   | Missing | System            | 880  | 87.4  |       |       |
|                   |         | Total             | 1007 | 100.0 |       |       |
| Dublin North East | Valid   | Strongly Disagree | 3    | .3    | 2.0   | 2.0   |
|                   |         | Disagree          | 13   | 1.3   | 8.8   | 10.9  |
|                   |         | Neither           | 7    | .7    | 4.8   | 15.6  |
|                   |         | Agree             | 85   | 8.5   | 57.8  | 73.5  |
|                   |         | Strongly Agree    | 39   | 3.9   | 26.5  | 100.0 |
|                   |         | Total             | 147  | 14.7  | 100.0 |       |
|                   | Missing | System            | 854  | 85.3  |       |       |
|                   |         | Total             | 1001 | 100.0 |       |       |
| Dublin Midlands   | Valid   | Strongly Disagree | 1    | .1    | .6    | .6    |
|                   |         | Disagree          | 14   | 1.4   | 9.0   | 9.6   |
|                   |         | Neither           | 11   | 1.1   | 7.1   | 16.7  |
|                   |         | Agree             | 83   | 8.2   | 53.2  | 69.9  |
|                   |         | Strongly Agree    | 47   | 4.7   | 30.1  | 100.0 |
|                   |         | Total             | 156  | 15.5  | 100.0 |       |
|                   | Missing | System            | 852  | 84.5  |       |       |
|                   |         | Total             | 1008 | 100.0 |       |       |
| Dublin South      | Valid   | Strongly Disagree | 3    | .3    | 1.9   | 1.9   |
|                   |         | Disagree          | 14   | 1.4   | 8.6   | 10.5  |
|                   |         | Neither           | 6    | .6    | 3.7   | 14.2  |
|                   |         | Agree             | 92   | 9.2   | 56.8  | 71.0  |
|                   |         | Strongly Agree    | 47   | 4.7   | 29.0  | 100.0 |
|                   |         | Total             | 162  | 16.2  | 100.0 |       |
|                   | Missing | System            | 840  | 83.8  |       |       |
|                   |         | Total             | 1002 | 100.0 |       |       |

**q23a [Overall Rating of Care]**

| Region     |         |           | Frequency | Percent | Valid Percent | Cumulative Percent |
|------------|---------|-----------|-----------|---------|---------------|--------------------|
| South      | Valid   | Excellent | 56        | 5.6     | 37.6          | 37.6               |
|            |         | Very Good | 53        | 5.3     | 35.6          | 73.2               |
|            |         | Good      | 23        | 2.3     | 15.4          | 88.6               |
|            |         | Fair      | 10        | 1.0     | 6.7           | 95.3               |
|            |         | Poor      | 2         | .2      | 1.3           | 96.6               |
|            |         | Very Poor | 5         | .5      | 3.4           | 100.0              |
|            |         | Total     | 149       | 14.9    | 100.0         |                    |
|            | Missing | System    | 854       | 85.1    |               |                    |
| Total      |         |           | 1003      | 100.0   |               |                    |
| Mid-West   | Valid   | Excellent | 45        | 4.5     | 29.0          | 29.0               |
|            |         | Very Good | 52        | 5.2     | 33.5          | 62.6               |
|            |         | Good      | 34        | 3.4     | 21.9          | 84.5               |
|            |         | Fair      | 16        | 1.6     | 10.3          | 94.8               |
|            |         | Poor      | 6         | .6      | 3.9           | 98.7               |
|            |         | Very Poor | 2         | .2      | 1.3           | 100.0              |
|            |         | Total     | 155       | 15.6    | 100.0         |                    |
|            | Missing | System    | 837       | 84.4    |               |                    |
| Total      |         |           | 992       | 100.0   |               |                    |
| South East | Valid   | Excellent | 47        | 4.7     | 33.8          | 33.8               |
|            |         | Very Good | 46        | 4.6     | 33.1          | 66.9               |
|            |         | Good      | 33        | 3.3     | 23.7          | 90.6               |
|            |         | Fair      | 9         | .9      | 6.5           | 97.1               |
|            |         | Poor      | 2         | .2      | 1.4           | 98.6               |
|            |         | Very Poor | 2         | .2      | 1.4           | 100.0              |
|            |         | Total     | 139       | 14.0    | 100.0         |                    |
|            | Missing | System    | 857       | 86.0    |               |                    |
| Total      |         |           | 996       | 100.0   |               |                    |
| North East | Valid   | Excellent | 61        | 6.1     | 36.7          | 36.7               |
|            |         | Very Good | 54        | 5.4     | 32.5          | 69.3               |
|            |         | Good      | 24        | 2.4     | 14.5          | 83.7               |
|            |         | Fair      | 19        | 1.9     | 11.4          | 95.2               |
|            |         | Poor      | 4         | .4      | 2.4           | 97.6               |
|            |         | Very Poor | 4         | .4      | 2.4           | 100.0              |
|            |         | Total     | 166       | 16.7    | 100.0         |                    |
|            | Missing | System    | 827       | 83.3    |               |                    |
| Total      |         |           | 993       | 100.0   |               |                    |
| West       | Valid   | Excellent | 47        | 4.7     | 37.0          | 37.0               |

|                   |         |           |      |       |       |       |
|-------------------|---------|-----------|------|-------|-------|-------|
|                   |         | Very Good | 44   | 4.4   | 34.6  | 71.7  |
|                   |         | Good      | 20   | 2.0   | 15.7  | 87.4  |
|                   |         | Fair      | 10   | 1.0   | 7.9   | 95.3  |
|                   |         | Poor      | 4    | .4    | 3.1   | 98.4  |
|                   |         | Very Poor | 2    | .2    | 1.6   | 100.0 |
|                   |         | Total     | 127  | 12.6  | 100.0 |       |
|                   | Missing | System    | 880  | 87.4  |       |       |
|                   | Total   |           | 1007 | 100.0 |       |       |
| Dublin North East | Valid   | Excellent | 63   | 6.3   | 42.6  | 42.6  |
|                   |         | Very Good | 40   | 4.0   | 27.0  | 69.6  |
|                   |         | Good      | 22   | 2.2   | 14.9  | 84.5  |
|                   |         | Fair      | 12   | 1.2   | 8.1   | 92.6  |
|                   |         | Poor      | 5    | .5    | 3.4   | 95.9  |
|                   |         | Very Poor | 6    | .6    | 4.1   | 100.0 |
|                   |         | Total     | 148  | 14.8  | 100.0 |       |
|                   | Missing | System    | 853  | 85.2  |       |       |
|                   | Total   |           | 1001 | 100.0 |       |       |
| Dublin Midlands   | Valid   | Excellent | 55   | 5.5   | 35.3  | 35.3  |
|                   |         | Very Good | 52   | 5.2   | 33.3  | 68.6  |
|                   |         | Good      | 30   | 3.0   | 19.2  | 87.8  |
|                   |         | Fair      | 13   | 1.3   | 8.3   | 96.2  |
|                   |         | Poor      | 2    | .2    | 1.3   | 97.4  |
|                   |         | Very Poor | 4    | .4    | 2.6   | 100.0 |
|                   |         | Total     | 156  | 15.5  | 100.0 |       |
|                   | Missing | System    | 852  | 84.5  |       |       |
|                   | Total   |           | 1008 | 100.0 |       |       |
| Dublin South      | Valid   | Excellent | 58   | 5.8   | 35.4  | 35.4  |
|                   |         | Very Good | 58   | 5.8   | 35.4  | 70.7  |
|                   |         | Good      | 30   | 3.0   | 18.3  | 89.0  |
|                   |         | Fair      | 9    | .9    | 5.5   | 94.5  |
|                   |         | Poor      | 5    | .5    | 3.0   | 97.6  |
|                   |         | Very Poor | 4    | .4    | 2.4   | 100.0 |
|                   |         | Total     | 164  | 16.4  | 100.0 |       |
|                   | Missing | System    | 838  | 83.6  |       |       |
|                   | Total   |           | 1002 | 100.0 |       |       |

Regression results:

**Linear regression – Dependent variable: Entry into the System**

**Model Summary**

| Model | R                 | R Square | Adjusted R Square | Std. Error of the Estimate | Change Statistics |          |     |      |               |
|-------|-------------------|----------|-------------------|----------------------------|-------------------|----------|-----|------|---------------|
|       |                   |          |                   |                            | R Square Change   | F Change | df1 | df2  | Sig. F Change |
| 1     | .250 <sup>a</sup> | .062     | .042              | .73674                     | .062              | 3.116    | 24  | 1126 | .000          |

a. Predictors: (Constant), OtherConditionDummy, DublinNorthEastDummy, AllergicReactionDummy, InfectionDummy, MentalHealthDummy, InjuryDummy, Gender, NewAgeRanges, IllnessDummy, Private ED, SouthEastDummy, Emergency Ambulance, GP Out of Hours, WestDummy, Private LIU, Public LIU, MidWestDummy, Pharmacist, OtherServices, DublinMidlandsDummy, GP In Hours, NorthEastDummy, Public ED, SouthDummy

**ANOVA<sup>a</sup>**

| Model |            | Sum of Squares | df   | Mean Square | F     | Sig.              |
|-------|------------|----------------|------|-------------|-------|-------------------|
| 1     | Regression | 40.586         | 24   | 1.691       | 3.116 | .000 <sup>b</sup> |
|       | Residual   | 611.171        | 1126 | .543        |       |                   |
|       | Total      | 651.757        | 1150 |             |       |                   |

a. Dependent Variable: EntryIntoSystemMean

b. Predictors: (Constant), OtherConditionDummy, DublinNorthEastDummy, AllergicReactionDummy, InfectionDummy, MentalHealthDummy, InjuryDummy, Gender, NewAgeRanges, IllnessDummy, Private ED, SouthEastDummy, Emergency Ambulance, GP Out of Hours, WestDummy, Private LIU, Public LIU, MidWestDummy, Pharmacist, OtherServices, DublinMidlandsDummy, GP In Hours, NorthEastDummy, Public ED, SouthDummy



| Model                 | Unstandardized Coefficients |            | Standardized Coefficients | t      | Sig. | 95.0% Confidence Interval for B |             | Correlations |         |       | Collinearity Statistics |       |
|-----------------------|-----------------------------|------------|---------------------------|--------|------|---------------------------------|-------------|--------------|---------|-------|-------------------------|-------|
|                       | B                           | Std. Error | Beta                      |        |      | Lower Bound                     | Upper Bound | Zero-order   | Partial | Part  | Tolerance               | VIF   |
| 1 (Constant)          | 4.501                       | .094       |                           | 47.953 | .000 | 4.316                           | 4.685       |              |         |       |                         |       |
| Gender                | -.052                       | .044       | -.034                     | -1.183 | .237 | -.138                           | .034        | -.025        | -.035   | -.034 | .984                    | 1.016 |
| AgeRange              | -.008                       | .020       | -.012                     | -.410  | .682 | -.047                           | .031        | -.004        | -.012   | -.012 | .952                    | 1.050 |
| SouthDummy            | -.064                       | .088       | -.028                     | -.732  | .464 | -.236                           | .108        | .009         | -.022   | -.021 | .560                    | 1.787 |
| MidWestDummy          | -.045                       | .088       | -.020                     | -.512  | .609 | -.217                           | .127        | -.003        | -.015   | -.015 | .566                    | 1.766 |
| SouthEastDummy        | -.078                       | .088       | -.034                     | -.892  | .373 | -.251                           | .094        | -.019        | -.027   | -.026 | .561                    | 1.782 |
| NorthEastDummy        | -.086                       | .088       | -.037                     | -.974  | .330 | -.258                           | .087        | -.003        | -.029   | -.028 | .563                    | 1.777 |
| WestDummy             | -.113                       | .088       | -.050                     | -1.289 | .198 | -.285                           | .059        | -.019        | -.038   | -.037 | .559                    | 1.788 |
| DublinNorthEastDummy  | -.181                       | .087       | -.080                     | -2.078 | .038 | -.352                           | -.010       | -.052        | -.062   | -.060 | .567                    | 1.763 |
| DublinMidlandsDummy   | .016                        | .087       | .007                      | .188   | .851 | -.155                           | .188        | .038         | .006    | .005  | .561                    | 1.782 |
| Pharmacist            | -.065                       | .047       | -.043                     | -1.372 | .170 | -.157                           | .028        | .016         | -.041   | -.040 | .856                    | 1.168 |
| GP In Hours           | -.133                       | .052       | -.085                     | -2.544 | .011 | -.236                           | -.031       | -.003        | -.076   | -.073 | .745                    | 1.342 |
| GP Out of Hours       | -.179                       | .060       | -.096                     | -2.994 | .003 | -.296                           | -.062       | -.064        | -.089   | -.086 | .802                    | 1.247 |
| Emergency Ambulance   | .015                        | .089       | .005                      | .166   | .868 | -.160                           | .189        | -.055        | .005    | .005  | .852                    | 1.173 |
| Public ED             | -.306                       | .055       | -.189                     | -5.620 | .000 | -.413                           | -.199       | -.160        | -.165   | -.162 | .739                    | 1.353 |
| Private ED            | -.380                       | .119       | -.095                     | -3.202 | .001 | -.613                           | -.147       | -.077        | -.095   | -.092 | .952                    | 1.051 |
| Public LIU            | -.030                       | .099       | -.009                     | -.307  | .759 | -.225                           | .164        | -.045        | -.009   | -.009 | .897                    | 1.114 |
| Private LIU           | -.058                       | .099       | -.018                     | -.587  | .557 | -.253                           | .136        | -.017        | -.017   | -.017 | .912                    | 1.096 |
| OtherServices         | -.627                       | .183       | -.106                     | -3.434 | .001 | -.985                           | -.269       | -.078        | -.102   | -.099 | .880                    | 1.137 |
| IllnessDummy          | .121                        | .079       | .048                      | 1.527  | .127 | -.035                           | .277        | .040         | .045    | .044  | .834                    | 1.199 |
| InjuryDummy           | .005                        | .125       | .001                      | .041   | .967 | -.240                           | .250        | -.038        | .001    | .001  | .823                    | 1.215 |
| AllergicReactionDummy | -.629                       | .651       | -.028                     | -.966  | .334 | -1.907                          | .649        | -.028        | -.029   | -.028 | .991                    | 1.010 |
| InfectionDummy        | .348                        | .419       | .024                      | .831   | .406 | -.474                           | 1.170       | .032         | .025    | .024  | .981                    | 1.019 |
| MentalHealthDummy     | .111                        | .632       | .005                      | .176   | .860 | -1.128                          | 1.350       | -.014        | .005    | .005  | .948                    | 1.055 |
| OtherConditionDummy   | -.058                       | .306       | -.006                     | -.190  | .850 | -.658                           | .542        | -.009        | -.006   | -.005 | .990                    | 1.010 |

a. Dependent Variable: EntryIntoSystemMean

**Linear regression – Dependent variable: Patient Convenience of the System**

**Model Summary**

| Model | R                 | R Square | Adjusted R Square | Std. Error of the Estimate | Change Statistics |          |     |     |               |
|-------|-------------------|----------|-------------------|----------------------------|-------------------|----------|-----|-----|---------------|
|       |                   |          |                   |                            | R Square Change   | F Change | df1 | df2 | Sig. F Change |
| 1     | .363 <sup>a</sup> | .132     | .110              | .71303                     | .132              | 5.957    | 24  | 941 | .000          |

a. Predictors: (Constant), DublinSouthDummy, Gender, MentalHealthDummy, OtherConditionDummy, AllergicReactionDummy, InjuryDummy, InfectionDummy, NewAgeRanges, IllnessDummy, Private ED, SouthEastDummy, Emergency Ambulance, GP Out of Hours, DublinMidlandsDummy, Private LIU, Public LIU, MidWestDummy, Pharmacist, OtherServices, NorthEastDummy, GP In Hours, WestDummy, Public ED, DublinNorthEastDummy

**ANOVA<sup>a</sup>**

| Model |            | Sum of Squares | df  | Mean Square | F     | Sig.              |
|-------|------------|----------------|-----|-------------|-------|-------------------|
| 1     | Regression | 72.681         | 24  | 3.028       | 5.957 | .000 <sup>b</sup> |
|       | Residual   | 478.410        | 941 | .508        |       |                   |
|       | Total      | 551.092        | 965 |             |       |                   |

a. Dependent Variable: PatientConvenienceMean

b. Predictors: (Constant), DublinSouthDummy, Gender, MentalHealthDummy, OtherConditionDummy, AllergicReactionDummy, InjuryDummy, InfectionDummy, NewAgeRanges, IllnessDummy, Private ED, SouthEastDummy, Emergency Ambulance, GP Out of Hours, DublinMidlandsDummy, Private LIU, Public LIU, MidWestDummy, Pharmacist, OtherServices, NorthEastDummy, GP In Hours, WestDummy, Public ED, DublinNorthEastDummy

**Coefficients<sup>a</sup>**

| Model                 | Unstandardized Coefficients |            | Standardized Coefficients | t      | Sig. | 95.0% Confidence Interval for B |             | Correlations |         |       | Collinearity Statistics |       |
|-----------------------|-----------------------------|------------|---------------------------|--------|------|---------------------------------|-------------|--------------|---------|-------|-------------------------|-------|
|                       | B                           | Std. Error | Beta                      |        |      | Lower Bound                     | Upper Bound | Zero-order   | Partial | Part  | Tolerance               | VIF   |
|                       |                             |            |                           |        |      |                                 |             |              |         |       |                         |       |
| (Constant)            | 4.081                       | .099       |                           | 41.342 | .000 | 3.887                           | 4.275       |              |         |       |                         |       |
| Gender                | -.021                       | .046       | -.014                     | -.454  | .650 | -.112                           | .070        | .009         | -.015   | -.014 | .984                    | 1.016 |
| AgeRange              | -.008                       | .021       | -.013                     | -.402  | .688 | -.049                           | .033        | -.004        | -.013   | -.012 | .952                    | 1.050 |
| MidWestDummy          | -.158                       | .092       | -.069                     | -1.704 | .089 | -.339                           | .024        | -.040        | -.055   | -.052 | .567                    | 1.762 |
| SouthEastDummy        | -.119                       | .092       | -.052                     | -1.293 | .196 | -.300                           | .062        | -.035        | -.042   | -.039 | .569                    | 1.758 |
| NorthEastDummy        | -.035                       | .092       | -.015                     | -.376  | .707 | -.215                           | .146        | .036         | -.012   | -.011 | .571                    | 1.751 |
| WestDummy             | -.154                       | .092       | -.068                     | -1.669 | .095 | -.336                           | .027        | -.032        | -.054   | -.051 | .561                    | 1.783 |
| DublinNorthEastDummy  | -.117                       | .093       | -.051                     | -1.259 | .208 | -.300                           | .065        | -.017        | -.041   | -.038 | .556                    | 1.800 |
| DublinMidlandsDummy   | -.050                       | .092       | -.022                     | -.543  | .587 | -.231                           | .131        | .005         | -.018   | -.017 | .563                    | 1.777 |
| Pharmacist            | .020                        | .050       | .013                      | .399   | .690 | -.078                           | .118        | .106         | .013    | .012  | .856                    | 1.168 |
| GP In Hours           | -.039                       | .055       | -.025                     | -.705  | .481 | -.148                           | .070        | .083         | -.023   | -.021 | .745                    | 1.342 |
| GP Out of Hours       | -.122                       | .063       | -.066                     | -1.938 | .053 | -.246                           | .002        | -.059        | -.063   | -.059 | .802                    | 1.246 |
| Emergency Ambulance   | .057                        | .094       | .020                      | .604   | .546 | -.128                           | .241        | -.108        | .020    | .018  | .852                    | 1.173 |
| Public ED             | -.554                       | .058       | -.340                     | -9.623 | .000 | -.667                           | -.441       | -.337        | -.299   | -.292 | .739                    | 1.353 |
| Private ED            | -.140                       | .125       | -.035                     | -1.118 | .264 | -.386                           | .106        | -.017        | -.036   | -.034 | .952                    | 1.050 |
| Public LIU            | .166                        | .105       | .051                      | 1.586  | .113 | -.040                           | .373        | -.019        | .052    | .048  | .897                    | 1.115 |
| Private LIU           | .082                        | .105       | .025                      | .785   | .433 | -.123                           | .288        | .025         | .026    | .024  | .913                    | 1.095 |
| OtherServices         | -.202                       | .193       | -.034                     | -1.048 | .295 | -.580                           | .176        | -.023        | -.034   | -.032 | .880                    | 1.137 |
| IllnessDummy          | .107                        | .084       | .043                      | 1.279  | .201 | -.057                           | .272        | .081         | .042    | .039  | .834                    | 1.199 |
| InjuryDummy           | -.073                       | .132       | -.018                     | -.550  | .582 | -.332                           | .187        | -.083        | -.018   | -.017 | .823                    | 1.215 |
| AllergicReactionDummy | -.710                       | .688       | -.031                     | -1.032 | .302 | -2.060                          | .640        | -.028        | -.034   | -.031 | .991                    | 1.010 |
| InfectionDummy        | .422                        | .442       | .029                      | .954   | .340 | -.446                           | 1.291       | .052         | .031    | .029  | .981                    | 1.019 |
| MentalHealthDummy     | -.884                       | .667       | -.041                     | -1.325 | .186 | -2.193                          | .426        | -.044        | -.043   | -.040 | .948                    | 1.055 |
| OtherConditionDummy   | .069                        | .323       | .007                      | .214   | .830 | -.565                           | .703        | .001         | .007    | .007  | .990                    | 1.010 |
| 1 DublinSouthDummy    | -.082                       | .093       | -.036                     | -.886  | .376 | -.264                           | .100        | .025         | -.029   | -.027 | .561                    | 1.784 |

a. Dependent Variable: PatientConvenienceMean

**Linear regression – Dependent variable: Progress through the System**

**Model Summary**

| Model | R                 | R Square | Adjusted R Square | Std. Error of the Estimate | Change Statistics |          |     |      |               |
|-------|-------------------|----------|-------------------|----------------------------|-------------------|----------|-----|------|---------------|
|       |                   |          |                   |                            | R Square Change   | F Change | df1 | df2  | Sig. F Change |
| 1     | .302 <sup>a</sup> | .091     | .069              | .72723                     | .091              | 4.219    | 24  | 1011 | .000          |

a. Predictors: (Constant), DublinSouthDummy, Gender, MentalHealthDummy, OtherConditionDummy, AllergicReactionDummy, InjuryDummy, InfectionDummy, NewAgeRanges, IllnessDummy, Private ED, SouthEastDummy, Emergency Ambulance, GP Out of Hours, DublinMidlandsDummy, Private LIU, Public LIU, MidWestDummy, Pharmacist, OtherServices, NorthEastDummy, GP In Hours, WestDummy, Public ED, DublinNorthEastDummy

**ANOVA<sup>a</sup>**

| Model |            | Sum of Squares | df   | Mean Square | F     | Sig.              |
|-------|------------|----------------|------|-------------|-------|-------------------|
| 1     | Regression | 53.554         | 24   | 2.231       | 4.219 | .000 <sup>b</sup> |
|       | Residual   | 534.677        | 1011 | .529        |       |                   |
|       | Total      | 588.230        | 1035 |             |       |                   |

a. Dependent Variable: ProgressMean

b. Predictors: (Constant), DublinSouthDummy, Gender, MentalHealthDummy, OtherConditionDummy, AllergicReactionDummy, InjuryDummy, InfectionDummy, NewAgeRanges, IllnessDummy, Private ED, SouthEastDummy, Emergency Ambulance, GP Out of Hours, DublinMidlandsDummy, Private LIU, Public LIU, MidWestDummy, Pharmacist, OtherServices, NorthEastDummy, GP In Hours, WestDummy, Public ED, DublinNorthEastDummy

Coefficients<sup>a</sup>

| Model                 | Unstandardized Coefficients |            | Standardized Coefficients | t      | Sig. | 95.0% Confidence Interval for B |             | Correlations |         |       | Collinearity Statistics |       |
|-----------------------|-----------------------------|------------|---------------------------|--------|------|---------------------------------|-------------|--------------|---------|-------|-------------------------|-------|
|                       | B                           | Std. Error | Beta                      |        |      | Lower Bound                     | Upper Bound | Zero-order   | Partial | Part  | Tolerance               | VIF   |
| 1 (Constant)          | 4.276                       | .097       |                           | 43.982 | .000 | 4.085                           | 4.466       |              |         |       |                         |       |
| Gender                | -.009                       | .046       | -.006                     | -1.189 | .850 | -.098                           | .081        | .001         | -.006   | -.006 | .984                    | 1.016 |
| AgeRange              | .037                        | .021       | .055                      | 1.801  | .072 | -.003                           | .077        | .065         | .057    | .054  | .952                    | 1.050 |
| MidWestDummy          | -.157                       | .091       | -.069                     | -1.724 | .085 | -.336                           | .022        | -.040        | -.054   | -.052 | .567                    | 1.762 |
| SouthEastDummy        | -.035                       | .091       | -.015                     | -.388  | .698 | -.213                           | .143        | .016         | -.012   | -.012 | .569                    | 1.758 |
| NorthEastDummy        | -.067                       | .091       | -.029                     | -.736  | .462 | -.245                           | .111        | .024         | -.023   | -.022 | .571                    | 1.751 |
| WestDummy             | -.184                       | .091       | -.081                     | -2.027 | .043 | -.363                           | -.006       | -.041        | -.064   | -.061 | .561                    | 1.783 |
| DublinNorthEastDummy  | -.165                       | .092       | -.072                     | -1.798 | .072 | -.345                           | .015        | -.022        | -.056   | -.054 | .556                    | 1.800 |
| DublinMidlandsDummy   | -.073                       | .091       | -.032                     | -.801  | .424 | -.251                           | .105        | .001         | -.025   | -.024 | .563                    | 1.777 |
| Pharmacist            | .011                        | .049       | .007                      | .217   | .828 | -.086                           | .107        | .057         | .007    | .007  | .856                    | 1.168 |
| GP In Hours           | -.233                       | .055       | -.149                     | -4.277 | .000 | -.340                           | -.126       | -.045        | -.133   | -.128 | .745                    | 1.342 |
| GP Out of Hours       | -.204                       | .062       | -.110                     | -3.276 | .001 | -.326                           | -.082       | -.057        | -.102   | -.098 | .802                    | 1.246 |
| Emergency Ambulance   | .206                        | .093       | .072                      | 2.219  | .027 | .024                            | .387        | -.007        | .070    | .067  | .852                    | 1.173 |
| Public ED             | -.419                       | .057       | -.257                     | -7.379 | .000 | -.530                           | -.307       | -.213        | -.226   | -.221 | .739                    | 1.353 |
| Private ED            | -.212                       | .123       | -.053                     | -1.714 | .087 | -.454                           | .031        | -.032        | -.054   | -.051 | .952                    | 1.050 |
| Public LIU            | .012                        | .103       | .004                      | .113   | .910 | -.191                           | .215        | -.043        | .004    | .003  | .897                    | 1.115 |
| Private LIU           | .041                        | .103       | .013                      | .399   | .690 | -.161                           | .244        | .017         | .013    | .012  | .913                    | 1.095 |
| OtherServices         | -.430                       | .190       | -.072                     | -2.267 | .024 | -.803                           | -.058       | -.050        | -.071   | -.068 | .880                    | 1.137 |
| IllnessDummy          | .178                        | .083       | .071                      | 2.154  | .032 | .016                            | .340        | .073         | .068    | .065  | .834                    | 1.199 |
| InjuryDummy           | -.062                       | .130       | -.016                     | -.477  | .634 | -.317                           | .193        | -.050        | -.015   | -.014 | .823                    | 1.215 |
| AllergicReactionDummy | -.559                       | .678       | -.025                     | -.826  | .409 | -1.889                          | .770        | -.029        | -.026   | -.025 | .991                    | 1.010 |
| InfectionDummy        | -.027                       | .436       | -.002                     | -.063  | .950 | -.882                           | .828        | .003         | -.002   | -.002 | .981                    | 1.019 |
| MentalHealthDummy     | -.328                       | .657       | -.015                     | -.499  | .618 | -1.617                          | .962        | -.026        | -.016   | -.015 | .948                    | 1.055 |
| OtherConditionDummy   | -.318                       | .318       | -.030                     | -.998  | .319 | -.942                           | .307        | -.035        | -.031   | -.030 | .990                    | 1.010 |
| DublinSouthDummy      | -.130                       | .091       | -.057                     | -1.421 | .156 | -.309                           | .049        | .007         | -.045   | -.043 | .561                    | 1.784 |

a. Dependent Variable: ProgressMean

**Logistic Regression – Dependent variable: Overall rating of care**

**Variables in the Equation**

|                                  | B      | S.E.  | Wald   | df | Sig. | Exp(B) | 95% C.I. for EXP(B) |       |
|----------------------------------|--------|-------|--------|----|------|--------|---------------------|-------|
|                                  |        |       |        |    |      |        | Lower               | Upper |
| Step 1 <sup>a</sup> NewAgeRanges | .208   | .055  | 14.058 | 1  | .000 | 1.231  | 1.104               | 1.372 |
| Gender                           | .107   | .125  | .725   | 1  | .394 | 1.113  | .870                | 1.423 |
| SouthDummy                       | -.193  | .245  | .622   | 1  | .430 | .824   | .510                | 1.333 |
| MidWestDummy                     | -.570  | .249  | 5.215  | 1  | .022 | .566   | .347                | .922  |
| SouthEastDummy                   | -.332  | .252  | 1.734  | 1  | .188 | .718   | .438                | 1.176 |
| NorthEastDummy                   | -.255  | .239  | 1.133  | 1  | .287 | .775   | .485                | 1.239 |
| WestDummy                        | -.288  | .256  | 1.266  | 1  | .261 | .750   | .454                | 1.239 |
| DublinMidlandsDummy              | -.281  | .243  | 1.340  | 1  | .247 | .755   | .469                | 1.215 |
| DublinSouthDummy                 | -.371  | .238  | 2.427  | 1  | .119 | .690   | .433                | 1.100 |
| Pharmacist                       | -.050  | .132  | .142   | 1  | .706 | .951   | .735                | 1.233 |
| GPIInHours                       | -.222  | .148  | 2.235  | 1  | .135 | .801   | .599                | 1.071 |
| GPOutOfHours                     | -.423  | .174  | 5.872  | 1  | .015 | .655   | .466                | .922  |
| EmergencyAmbulance               | .243   | .253  | .928   | 1  | .335 | 1.276  | .777                | 2.093 |
| PublicED                         | -.512  | .158  | 10.445 | 1  | .001 | .599   | .439                | .818  |
| PrivateED                        | -.142  | .338  | .177   | 1  | .674 | .867   | .448                | 1.681 |
| PublicLIU                        | -.028  | .286  | .010   | 1  | .921 | .972   | .555                | 1.704 |
| PrivateLIU                       | -.137  | .280  | .239   | 1  | .625 | .872   | .504                | 1.508 |
| OtherServices                    | .208   | .198  | 1.103  | 1  | .294 | 1.232  | .835                | 1.817 |
| IllnessDummy                     | .692   | .530  | 1.703  | 1  | .192 | 1.997  | .707                | 5.645 |
| InjuryDummy                      | .589   | .541  | 1.185  | 1  | .276 | 1.802  | .624                | 5.204 |
| AllergicReactionDummy            | -.713  | 1.191 | .359   | 1  | .549 | .490   | .048                | 5.054 |
| InfectionDummy                   | .805   | .686  | 1.376  | 1  | .241 | 2.237  | .583                | 8.589 |
| MentalHealthDummy                | .279   | .882  | .100   | 1  | .752 | 1.322  | .235                | 7.449 |
| OtherConditionDummy              | .891   | .617  | 2.088  | 1  | .149 | 2.437  | .728                | 8.159 |
| Constant                         | -1.136 | .590  | 3.709  | 1  | .054 | .321   |                     |       |

a. Variable(s) entered on step 1: NewAgeRanges, Gender, SouthDummy, MidWestDummy, SouthEastDummy, NorthEastDummy, WestDummy, DublinMidlandsDummy, DublinSouthDummy, Pharmacist, GPIInHours, GPOutOfHours, EmergencyAmbulance, PublicED, PrivateED, PublicLIU, PrivateLIU, OtherServices, IllnessDummy, InjuryDummy, AllergicReactionDummy, InfectionDummy, MentalHealthDummy, OtherConditionDummy.
